# Supplementary material for: Exploitation of Olive (Olea europaea L.) Seed Proteins as Upgraded Source of Bioactive Peptides with Multifunctional Properties: Focus on Antioxidant and Dipeptidyl-Dipeptidase—IV Inhibitory Activities, and Glucagon-like Peptide 1 Improved Modulation
Source: Antioxidants (Basel). 2022 Aug 31;11(9):1730. doi: 10.3390/antiox11091730 (PMC9495363; doi:10.3390/antiox11091730)
Supplement: Supplementary file 1 [file antioxidants-11-01730-s001.zip › Table S1_Table olive seed peptides SX-SY.xlsx]

## Sheet: Table SX
Sequence	Length	Mass	Proteins	Leading razor protein	Unique (Groups)	Unique (Proteins)	Charges	Experiment F1_A1	Experiment F1_A2	Experiment F1_A3	Experiment F2_A1	Experiment F2_A2	Experiment F2_A3	Experiment L1_A1	Experiment L1_A2	Experiment L1_A3	Experiment L2_A1	Experiment L2_A2	Experiment L2_A3	Experiment M1_A1	Experiment M1_A2	Experiment M1_A3	Experiment M2_A1	Experiment M2_A2	Experiment M2_A3	Intensity F1_A1	Intensity F1_A2	Intensity F1_A3	Intensity F2_A1	Intensity F2_A2	Intensity F2_A3	Intensity L1_A1	Intensity L1_A2	Intensity L1_A3	Intensity L2_A1	Intensity L2_A2	Intensity L2_A3	Intensity M1_A1	Intensity M1_A2	Intensity M1_A3	Intensity M2_A1	Intensity M2_A2	Intensity M2_A3	Oxidation (M) site IDs
ADLPGLKKEEVKVE	14	1553.87	tr|E1UIZ9|E1UIZ9_OLEEU	tr|E1UIZ9|E1UIZ9_OLEEU	yes	yes	3				1	1	1					1	1					1	1	0	0	0	176880	4151300	2313500	0	0	0	0	2002900	2354000	0	0	0	0	253690	260580
ADVYNVEPE	9	1034.46	sp|C0HK96|Y0001_OLEEU	sp|C0HK96|Y0001_OLEEU	yes	yes	2																		1	0	0	0	0	0	0	0	0	0	0	0	0	0	0	0	0	0	153800
ADVYNVEPETLR	12	1404.69	sp|C0HK96|Y0001_OLEEU	sp|C0HK96|Y0001_OLEEU	yes	yes	2				1	1	2			1	2	1	2				1	1	1	0	0	0	18757000	71764000	46815000	0	0	354130	37703000	76417000	88236000	0	0	0	35499000	31393000	25430000
AGFAGDDAPRAVFPS	15	1476.7	tr|A0A097CPF6|A0A097CPF6_9LAMI	tr|A0A097CPF6|A0A097CPF6_9LAMI	yes	yes	2		1	1					2	1				1	1	1				0	0	2437400	0	0	0	0	0	1775100	0	0	0	660010	1377800	1030500	0	0	0
AGKEHGAPE	9	894.42	tr|A0A0U4AVG8|A0A0U4AVG8_9LAMI	tr|A0A0U4AVG8|A0A0U4AVG8_9LAMI	yes	yes	2								1											0	0	0	0	0	0	0	53980	0	0	0	0	0	0	0	0	0	0
AIAIDTILN	9	942.539	tr|A0A2H4V4Y7|A0A2H4V4Y7_9LAMI;tr|A5JW39|A5JW39_OLEEU;tr|A5JW37|A5JW37_OLEEU;tr|Q5S815|Q5S815_SYRVU;tr|A0A6B9D9J3|A0A6B9D9J3_9LAMI;tr|A0A2H4V504|A0A2H4V504_9LAMI;tr|A0A2H4V4Y1|A0A2H4V4Y1_SYRVU;tr|A0A2H4V4X9|A0A2H4V4X9_9LAMI;tr|A0A2H4V4X4|A0A2H4V4X4_9LAMI;tr|A0A2H4V4X2|A0A2H4V4X2_9LAMI;tr|A0A2H4V4X1|A0A2H4V4X1_9LAMI;tr|A0A2H4V4W1|A0A2H4V4W1_OLEEU;tr|A0A2H4V4V5|A0A2H4V4V5_9LAMI;tr|A0A2H4V4Q2|A0A2H4…	tr|A0A2H4V4Y7|A0A2H4V4Y7_9LAMI	yes	no	2																1	1		0	0	0	0	0	0	0	0	0	0	0	0	0	0	0	424020	637280	0
APSKDAPMFVV	11	1160.59	tr|A0A0U2M8C0|A0A0U2M8C0_9LAMI;tr|A0A0U2LDZ7|A0A0U2LDZ7_9LAMI;tr|A0A0U2TI91|A0A0U2TI91_9LAMI;tr|A0A0A0V0V0|A0A0A0V0V0_9LAMI	tr|A0A0U2M8C0|A0A0U2M8C0_9LAMI	yes	no	2	1	1					1	1					1	1					2130100	1485300	0	0	0	0	9303200	2531300	0	0	0	0	1854800	782840	0	0	0	0
APSKDAPMFVVG	12	1217.61	tr|A0A0U2M8C0|A0A0U2M8C0_9LAMI;tr|A0A0U2LDZ7|A0A0U2LDZ7_9LAMI;tr|A0A0U2TI91|A0A0U2TI91_9LAMI;tr|A0A0A0V0V0|A0A0A0V0V0_9LAMI	tr|A0A0U2M8C0|A0A0U2M8C0_9LAMI	yes	no	2		1					1						1	1					0	3654600	0	0	0	0	2853100	0	0	0	0	0	657520	988670	0	0	0	0
ASGIIFPIMNAE	12	1261.64	tr|A0A2U8U7L2|A0A2U8U7L2_9LAMI	tr|A0A2U8U7L2|A0A2U8U7L2_9LAMI	yes	yes	2	1	1	1		1		1	1	1				1	1	1				216460	588400	0	0	467190	0	791560	1407800	1489100	0	0	0	1418800	0	1118300	0	0	0	3
AVDSLVPIGRGQ	12	1210.67	tr|A0A2H4V4Y7|A0A2H4V4Y7_9LAMI;tr|A5JW39|A5JW39_OLEEU;tr|A5JW37|A5JW37_OLEEU;tr|Q5S815|Q5S815_SYRVU;tr|A0A6B9D9J3|A0A6B9D9J3_9LAMI;tr|A0A2H4V504|A0A2H4V504_9LAMI;tr|A0A2H4V4Y1|A0A2H4V4Y1_SYRVU;tr|A0A2H4V4X9|A0A2H4V4X9_9LAMI;tr|A0A2H4V4X4|A0A2H4V4X4_9LAMI;tr|A0A2H4V4X2|A0A2H4V4X2_9LAMI;tr|A0A2H4V4X1|A0A2H4V4X1_9LAMI;tr|A0A2H4V4W1|A0A2H4V4W1_OLEEU;tr|A0A2H4V4V5|A0A2H4V4V5_9LAMI;tr|A0A2H4V4Q2|A0A2H4…	tr|A0A2H4V4Y7|A0A2H4V4Y7_9LAMI	yes	no	2			1				1	1	1				1	1	1				0	0	824020	0	0	0	479440	677200	854450	0	0	0	236810	343270	344600	0	0	0
AVIKKKYGQDAT	12	1320.74	tr|A0A7D0LW52|A0A7D0LW52_OLEEU	tr|A0A7D0LW52|A0A7D0LW52_OLEEU	yes	yes	2									1										0	0	0	0	0	0	0	0	0	0	0	0	0	0	0	0	0	0
DFTKDDENV	9	1081.46	tr|O20269|O20269_OLEEU;tr|Q06QP1|Q06QP1_OLEEU;tr|F6I9E5|F6I9E5_OLEEU;tr|F6I8P0|F6I8P0_OLEEU;tr|F6I7V4|F6I7V4_OLEEU;tr|F4MKQ4|F4MKQ4_OLEEU;tr|A0A7G7YFM0|A0A7G7YFM0_OLEEU;tr|A0A6B7GPL5|A0A6B7GPL5_9LAMI;tr|A0A4D6JD02|A0A4D6JD02_9LAMI;tr|A0A4D5YDQ1|A0A4D5YDQ1_9LAMI;tr|A0A4D5YDK0|A0A4D5YDK0_9LAMI;tr|A0A4D5Y648|A0A4D5Y648_9LAMI;tr|A0A4D5Y614|A0A4D5Y614_9LAMI;tr|A0A4D5Y5H8|A0A4D5Y5H8_9LAMI;tr|A0A4D5Y460…	tr|O20269|O20269_OLEEU	no	no	2		1																	0	39872	0	0	0	0	0	0	0	0	0	0	0	0	0	0	0	0
DQGMQRAEVMIKG	13	1461.71	tr|F6I9Q4|F6I9Q4_9LAMI;tr|F6I9G9|F6I9G9_OLEEU;tr|F6I8H9|F6I8H9_OLEEU;tr|F4MKS8|F4MKS8_OLEEU;tr|D2KLN5|D2KLN5_OLEEU;tr|A0A7U3K6L4|A0A7U3K6L4_FRAEX;tr|A0A7M3US96|A0A7M3US96_9LAMI;tr|A0A7H9SSK4|A0A7H9SSK4_9LAMI;tr|A0A7D5DPU7|A0A7D5DPU7_9LAMI;tr|A0A7D5BFF9|A0A7D5BFF9_9LAMI;tr|A0A6M8PF80|A0A6M8PF80_9LAMI;tr|A0A6M4K3C8|A0A6M4K3C8_9LAMI;tr|A0A6H0QZ55|A0A6H0QZ55_9LAMI;tr|A0A6B9VJB6|A0A6B9VJB6_9LAMI;tr|A0…	tr|F6I9Q4|F6I9Q4_9LAMI	yes	no	2						1													0	0	0	0	0	0	0	0	0	0	0	0	0	0	0	0	0	0	2
DQHEAWDDH	9	1151.43	tr|A0A1D5AHZ8|A0A1D5AHZ8_OLEEU	tr|A0A1D5AHZ8|A0A1D5AHZ8_OLEEU	yes	yes	2		1													1				0	267890	0	0	0	0	0	0	0	0	0	0	0	0	39030	0	0	0
DSHVPVLAPLPIGF	14	1460.8	tr|A0A1D5AHZ8|A0A1D5AHZ8_OLEEU	tr|A0A1D5AHZ8|A0A1D5AHZ8_OLEEU	no	no	2	1							1	1										126280	0	0	0	0	0	0	632560	537620	0	0	0	0	0	0	0	0	0
DVYNVEPETLR	11	1333.65	sp|C0HK96|Y0001_OLEEU	sp|C0HK96|Y0001_OLEEU	yes	yes	2				1	1	1				1	2	1				1	1	1	0	0	0	5913300	12377000	8923200	0	0	0	7015000	11888000	8353400	0	0	0	7721100	4923600	4070100
EGNVIIR	7	799.455	tr|O20269|O20269_OLEEU;tr|Q06QP1|Q06QP1_OLEEU;tr|F6I9E5|F6I9E5_OLEEU;tr|F6I8P0|F6I8P0_OLEEU;tr|F6I7V4|F6I7V4_OLEEU;tr|F4MKQ4|F4MKQ4_OLEEU;tr|A0A7G7YFM0|A0A7G7YFM0_OLEEU;tr|A0A6B7GPL5|A0A6B7GPL5_9LAMI;tr|A0A4D6JD02|A0A4D6JD02_9LAMI;tr|A0A4D5YDQ1|A0A4D5YDQ1_9LAMI;tr|A0A4D5YDK0|A0A4D5YDK0_9LAMI;tr|A0A4D5Y648|A0A4D5Y648_9LAMI;tr|A0A4D5Y614|A0A4D5Y614_9LAMI;tr|A0A4D5Y5H8|A0A4D5Y5H8_9LAMI;tr|A0A4D5Y460…	tr|O20269|O20269_OLEEU	no	no	2											1								0	0	0	0	0	0	0	0	0	0	0	0	0	0	0	0	0	0
ELRDGGSDYLGK	12	1308.63	tr|A0A7D0LW52|A0A7D0LW52_OLEEU	tr|A0A7D0LW52|A0A7D0LW52_OLEEU	yes	yes	2			1			1	1	1	1			1		1					0	0	271620	0	0	153270	54787	1171600	813300	0	0	269940	0	252300	0	0	0	0
ESRISNFYTNYQ	12	1520.69	tr|A0A2H4V4Y7|A0A2H4V4Y7_9LAMI	tr|A0A2H4V4Y7|A0A2H4V4Y7_9LAMI	yes	yes	2									3										0	0	0	0	0	0	0	0	0	0	0	0	0	0	0	0	0	0
EVESSDTIDNVK	12	1334.62	tr|Q944F7|Q944F7_OLEEU;tr|Q944F6|Q944F6_OLEEU	tr|Q944F7|Q944F7_OLEEU	yes	no	2					1	1						1						1	0	0	0	0	700370	428530	0	0	0	0	0	528010	0	0	0	0	0	119630
EVYSLWNQK	9	1165.58	tr|A0A4D5Y9P8|A0A4D5Y9P8_LIGJA	tr|A0A4D5Y9P8|A0A4D5Y9P8_LIGJA	yes	yes	3					1	1					1	1						1	0	0	0	0	191730	165710	0	0	0	0	66525	43539	0	0	0	0	0	69895
FAGDDAPR	8	847.382	tr|A0A097CPF6|A0A097CPF6_9LAMI	tr|A0A097CPF6|A0A097CPF6_9LAMI	yes	yes	2					1						1							1	0	0	0	0	0	0	0	0	0	0	0	0	0	0	0	0	0	0
FAGDDAPRAVFPS	13	1348.64	tr|A0A097CPF6|A0A097CPF6_9LAMI	tr|A0A097CPF6|A0A097CPF6_9LAMI	yes	yes	2		1																	0	0	0	0	0	0	0	0	0	0	0	0	0	0	0	0	0	0
FEFAAMDTL	9	1043.46	tr|O20269|O20269_OLEEU;tr|Q06QP1|Q06QP1_OLEEU;tr|F6I9E5|F6I9E5_OLEEU;tr|F6I8P0|F6I8P0_OLEEU;tr|F6I7V4|F6I7V4_OLEEU;tr|F4MKQ4|F4MKQ4_OLEEU;tr|A0A7G7YFM0|A0A7G7YFM0_OLEEU;tr|A0A6B7GPL5|A0A6B7GPL5_9LAMI;tr|A0A4D6JD02|A0A4D6JD02_9LAMI;tr|A0A4D5YDQ1|A0A4D5YDQ1_9LAMI;tr|A0A4D5YDK0|A0A4D5YDK0_9LAMI;tr|A0A4D5Y648|A0A4D5Y648_9LAMI;tr|A0A4D5Y614|A0A4D5Y614_9LAMI;tr|A0A4D5Y5H8|A0A4D5Y5H8_9LAMI;tr|A0A4D5Y460…	tr|O20269|O20269_OLEEU	no	no	2												1							0	0	0	0	0	0	0	0	0	0	0	310470	0	0	0	0	0	0
FKPIDEEPMAVNNPR	15	1755.86	tr|A0A385A1M1|A0A385A1M1_OLEEU;tr|A0A385A1L1|A0A385A1L1_OLEEU	tr|A0A385A1M1|A0A385A1M1_OLEEU	yes	no	2		1	1				1	1	1				1	1	1				0	2508900	4163600	0	0	0	839930	11944000	7924900	0	0	0	315650	7868000	2519400	0	0	0	4
FMILPVGAS	9	933.499	tr|A0A7D0LW52|A0A7D0LW52_OLEEU	tr|A0A7D0LW52|A0A7D0LW52_OLEEU	yes	yes	1	1	1	1					1	1					1	1				514480	436350	521190	0	0	0	0	378650	404300	0	0	0	0	88523	106970	0	0	0
FVDNAAYRE	9	1083.5	tr|V6BNU1|V6BNU1_OLEEU	tr|V6BNU1|V6BNU1_OLEEU	no	no	3		1	1				1	1	1						1				0	240570	276060	0	0	0	35489	277000	260610	0	0	0	0	0	36732	0	0	0
GAFRECAAY	9	986.428	tr|A0A385A1M1|A0A385A1M1_OLEEU;tr|A0A385A1L1|A0A385A1L1_OLEEU	tr|A0A385A1M1|A0A385A1M1_OLEEU	yes	no	2			1				1	1	1				1	1	1				0	0	79796	0	0	0	12375	23285	26714	0	0	0	10480	33668	33837	0	0	0
GEDKSGEDQ	9	963.378	tr|A0A4D5Y9P8|A0A4D5Y9P8_LIGJA	tr|A0A4D5Y9P8|A0A4D5Y9P8_LIGJA	no	no	2												1							0	0	0	0	0	0	0	0	0	0	0	247610	0	0	0	0	0	0
GFAGDDAPRAVFPS	14	1405.66	tr|A0A097CPF6|A0A097CPF6_9LAMI	tr|A0A097CPF6|A0A097CPF6_9LAMI	yes	yes	2	1	1	2				1	1	1				1	1	1				618930	1832200	3949500	0	0	0	2533700	2870100	3713300	0	0	0	729440	1040800	1385400	0	0	0
GIPPDQQRL	9	1022.55	tr|Q944F7|Q944F7_OLEEU;tr|Q944F6|Q944F6_OLEEU	tr|Q944F7|Q944F7_OLEEU	yes	no	2								1	1						1				0	0	0	0	0	0	0	342930	336490	0	0	0	0	0	207840	0	0	0
GVGVDSPVFRDL	12	1259.65	tr|Q8GVC8|Q8GVC8_OLEEU	tr|Q8GVC8|Q8GVC8_OLEEU	yes	yes	2	34	9	25		1		20	30	14		1	1	2	4	3				938480	17210000	4719600	0	42380	0	3994700	3041600	4326900	0	41163	29232	2344600	3846400	3610500	0	0	0
HFDESIPPH	9	1077.49	tr|A0A4D5Y9P8|A0A4D5Y9P8_LIGJA	tr|A0A4D5Y9P8|A0A4D5Y9P8_LIGJA	no	no	2	1								1										380890	0	0	0	0	0	0	0	261650	0	0	0	0	0	0	0	0	0
HFINAYEEK	9	1149.55	tr|A0A7S6AKL5|A0A7S6AKL5_OLEEU	tr|A0A7S6AKL5|A0A7S6AKL5_OLEEU	yes	yes	3								1											0	0	0	0	0	0	0	32885	0	0	0	0	0	0	0	0	0	0
HGAPGDENRHAGDL	14	1444.64	tr|A9LMI3|A9LMI3_OLEEU	tr|A9LMI3|A9LMI3_OLEEU	no	no	3		1	1					1	1					1					0	370990	150630	0	0	0	0	149410	220220	0	0	0	0	55106	0	0	0	0
HVPLLAPLPIGF	12	1272.76	tr|A0A1D5AHZ7|A0A1D5AHZ7_OLEEU	tr|A0A1D5AHZ7|A0A1D5AHZ7_OLEEU	yes	yes	2	1	1					1							1	1				1743000	1212800	0	0	0	0	1330800	0	0	0	0	0	0	189940	153190	0	0	0
HVPVLAPLPIGF	12	1258.74	tr|A0A1D5AHZ8|A0A1D5AHZ8_OLEEU	tr|A0A1D5AHZ8|A0A1D5AHZ8_OLEEU	no	no	2	1	1					1	1	1				4	1	1				7053900	3270900	0	0	0	0	3655700	0	360180	0	0	0	0	443930	103000	0	0	0
IDNVKAKIQ	9	1027.6	tr|Q944F7|Q944F7_OLEEU;tr|Q944F6|Q944F6_OLEEU	tr|Q944F7|Q944F7_OLEEU	yes	no	3	1	1	1				1	1	1				1	1	1				63557	745740	858760	0	0	0	253600	986830	1766900	0	0	0	78289	606550	349280	0	0	0
IDWKETPEG	9	1073.5	tr|E1UIZ9|E1UIZ9_OLEEU	tr|E1UIZ9|E1UIZ9_OLEEU	yes	yes	2					1														0	0	0	0	0	0	0	0	0	0	0	0	0	0	0	0	0	0
IEDPFDQDDWEHYAK	15	1906.8	tr|A0A7D0LW52|A0A7D0LW52_OLEEU	tr|A0A7D0LW52|A0A7D0LW52_OLEEU	yes	yes	3				1	1	1				1	1	1					1	1	0	0	0	1500400	981530	1229000	0	0	0	1559400	596010	676240	0	0	0	0	345330	438640
ILPSSMLAR	9	986.558	tr|A0A4D5Y9P8|A0A4D5Y9P8_LIGJA	tr|A0A4D5Y9P8|A0A4D5Y9P8_LIGJA	no	no	2										1									0	0	0	0	0	0	0	0	0	313160	0	0	0	0	0	0	0	0
INIVMAINHSAF	12	1328.69	tr|E6Y2L8|E6Y2L8_FRAEX;sp|E1U332|ALL12_OLEEU	tr|E6Y2L8|E6Y2L8_FRAEX	yes	no	2			1	1	1	1		1		1	1	1				1	1	1	0	0	284100	5185700	24966000	13325000	0	246990	0	5720500	11865000	13765000	0	0	0	12313000	9471800	16314000	1
IPITGTGIN	9	884.497	tr|A0A1D5AHZ8|A0A1D5AHZ8_OLEEU;tr|A0A1D5AHZ7|A0A1D5AHZ7_OLEEU	tr|A0A1D5AHZ8|A0A1D5AHZ8_OLEEU	no	no	1		1	1	1	1	1		1	1		1	1	1	1	1			1	0	9372400	11302000	6846500	22170000	6968500	0	2219500	2619300	0	10533000	10499000	1042400	1688800	2869500	0	0	18420000
IPPDQQRLIF	10	1225.68	tr|Q944F7|Q944F7_OLEEU;tr|Q944F6|Q944F6_OLEEU	tr|Q944F7|Q944F7_OLEEU	yes	no	2						1													0	0	0	0	0	0	0	0	0	0	0	0	0	0	0	0	0	0
IPPDQQRLIFAG	12	1353.74	tr|Q944F7|Q944F7_OLEEU;tr|Q944F6|Q944F6_OLEEU	tr|Q944F7|Q944F7_OLEEU	yes	no	3									1										0	0	0	0	0	0	0	0	0	0	0	0	0	0	0	0	0	0
ISGTWSNHE	9	1029.45	tr|A0A2H4V542|A0A2H4V542_9LAMI;tr|A0A2H4V4W4|A0A2H4V4W4_OLEEU;tr|A0A2H4V4P2|A0A2H4V4P2_OLEEU;tr|A0A2H4V4L4|A0A2H4V4L4_OLEEU;tr|A0A2H4V491|A0A2H4V491_OLEEU;tr|A0A2H4V554|A0A2H4V554_9LAMI;tr|A0A2H4V551|A0A2H4V551_9LAMI;tr|A0A2H4V549|A0A2H4V549_9LAMI;tr|A0A2H4V540|A0A2H4V540_9LAMI;tr|A0A2H4V527|A0A2H4V527_9LAMI;tr|A0A2H4V427|A0A2H4V427_9LAMI;tr|A0A1C9IAJ1|A0A1C9IAJ1_9LAMI;tr|A0A6B9DE00|A0A6B9DE00_9L…	tr|A0A2H4V542|A0A2H4V542_9LAMI	yes	no	2		1					1	1						1					0	438580	0	0	0	0	93895	629850	0	0	0	0	0	321810	0	0	0	0
IVDKQIPLTGPH	12	1316.75	tr|A9LMI3|A9LMI3_OLEEU	tr|A9LMI3|A9LMI3_OLEEU	no	no	2;3	1		1					2	2						1				93719	0	523780	0	0	0	0	1722900	1198900	0	0	0	0	0	158310	0	0	0
IVGDDLLVTNPK	12	1282.71	tr|A0A7D0LW52|A0A7D0LW52_OLEEU	tr|A0A7D0LW52|A0A7D0LW52_OLEEU	yes	yes	2		1	1				1	1	1				1	1	1				0	6214000	26392000	0	0	0	3904100	3953400	7883000	0	0	0	1250900	1162100	1778600	0	0	0
IVMHDYLTGGFT	12	1352.64	tr|O20269|O20269_OLEEU;tr|Q06QP1|Q06QP1_OLEEU;tr|F6I9E5|F6I9E5_OLEEU;tr|F6I8P0|F6I8P0_OLEEU;tr|F6I7V4|F6I7V4_OLEEU;tr|F4MKQ4|F4MKQ4_OLEEU;tr|A0A7G7YFM0|A0A7G7YFM0_OLEEU;tr|A0A6B7GPL5|A0A6B7GPL5_9LAMI;tr|A0A4D6JD02|A0A4D6JD02_9LAMI;tr|A0A4D5YDQ1|A0A4D5YDQ1_9LAMI;tr|A0A4D5YDK0|A0A4D5YDK0_9LAMI;tr|A0A4D5Y648|A0A4D5Y648_9LAMI;tr|A0A4D5Y614|A0A4D5Y614_9LAMI;tr|A0A4D5Y5H8|A0A4D5Y5H8_9LAMI;tr|A0A4D5Y460…	tr|O20269|O20269_OLEEU	no	no	2	1																		0	0	0	0	0	0	0	0	0	0	0	0	0	0	0	0	0	0
KDPTDQTGLDNFMVQ	15	1707.78	tr|A0A7D0LW52|A0A7D0LW52_OLEEU	tr|A0A7D0LW52|A0A7D0LW52_OLEEU	yes	yes	2				1	1	1				1	1	1					1	1	0	0	0	1147800	2353700	2170100	0	0	0	2811200	2918200	3272600	0	0	0	0	679110	880360
LDIVIPTIR	9	1038.64	tr|A0A411AR71|A0A411AR71_9LAMI	tr|A0A411AR71|A0A411AR71_9LAMI	yes	yes	2		1	1				2	1	1				1	1					0	0	2728800	0	0	0	1086300	294540	630800	0	0	0	218810	164950	0	0	0	0
LDKESRF	7	893.461	tr|A0A4D5Y9P8|A0A4D5Y9P8_LIGJA	tr|A0A4D5Y9P8|A0A4D5Y9P8_LIGJA	yes	yes	2								1											0	0	0	0	0	0	0	0	0	0	0	0	0	0	0	0	0	0
LEDLRIPTA	9	1026.57	tr|O20269|O20269_OLEEU;tr|Q06QP1|Q06QP1_OLEEU;tr|F6I9E5|F6I9E5_OLEEU;tr|F6I8P0|F6I8P0_OLEEU;tr|F6I7V4|F6I7V4_OLEEU;tr|F4MKQ4|F4MKQ4_OLEEU;tr|A0A7G7YFM0|A0A7G7YFM0_OLEEU;tr|A0A6B7GPL5|A0A6B7GPL5_9LAMI;tr|A0A4D6JD02|A0A4D6JD02_9LAMI;tr|A0A4D5YDQ1|A0A4D5YDQ1_9LAMI;tr|A0A4D5YDK0|A0A4D5YDK0_9LAMI;tr|A0A4D5Y648|A0A4D5Y648_9LAMI;tr|A0A4D5Y614|A0A4D5Y614_9LAMI;tr|A0A4D5Y5H8|A0A4D5Y5H8_9LAMI;tr|A0A4D5Y460…	tr|O20269|O20269_OLEEU	no	no	2					1	1				1	1	1					1	1	0	0	0	0	2821300	1586900	0	0	0	809630	1285500	4345100	0	0	0	0	0	823890
LEVESSDTIDNVK	13	1447.7	tr|Q944F7|Q944F7_OLEEU;tr|Q944F6|Q944F6_OLEEU	tr|Q944F7|Q944F7_OLEEU	yes	no	2				1							1	1				1	1	1	0	0	0	312910	0	0	0	0	0	0	3324300	2929100	0	0	0	0	704630	917500
LIGKDPTDQTGL	12	1256.66	tr|A0A7D0LW52|A0A7D0LW52_OLEEU	tr|A0A7D0LW52|A0A7D0LW52_OLEEU	yes	yes	2		1	1				1	1	1				1	1	1				0	1157900	1533500	0	0	0	424870	1432400	1342300	0	0	0	182390	259440	290020	0	0	0
LIGKDPTDQTGLDNF	15	1632.8	tr|A0A7D0LW52|A0A7D0LW52_OLEEU	tr|A0A7D0LW52|A0A7D0LW52_OLEEU	yes	yes	2		1	1				1	1	1				1	1					0	2118200	6910200	0	0	0	2982400	4286300	5795400	0	0	0	445490	866490	0	0	0	0
LMGDAFNMRHPL	12	1400.67	tr|A0A2U8U7L2|A0A2U8U7L2_9LAMI	tr|A0A2U8U7L2|A0A2U8U7L2_9LAMI	yes	yes	2									2										0	0	0	0	0	0	0	0	0	0	0	0	0	0	0	0	0	0
LNNEFVNRIQAL	12	1429.77	tr|A0A4D5Y9P8|A0A4D5Y9P8_LIGJA	tr|A0A4D5Y9P8|A0A4D5Y9P8_LIGJA	no	no	2	1																		0	0	0	0	0	0	0	0	0	0	0	0	0	0	0	0	0	0
LPESFEDCTFDW	12	1487.59	tr|A0A385A1M1|A0A385A1M1_OLEEU;tr|A0A385A1L1|A0A385A1L1_OLEEU	tr|A0A385A1M1|A0A385A1M1_OLEEU	yes	no	2									2										0	0	0	0	0	0	0	0	0	0	0	0	0	0	0	0	0	0
LPPMYDPFL	9	1091.54	tr|A0A4D5Y9P8|A0A4D5Y9P8_LIGJA	tr|A0A4D5Y9P8|A0A4D5Y9P8_LIGJA	no	no	2							1												0	0	0	0	0	0	43270	0	0	0	0	0	0	0	0	0	0	0
LPSSEMNQWKNW	12	1518.69	tr|A0A4D5Y9P8|A0A4D5Y9P8_LIGJA	tr|A0A4D5Y9P8|A0A4D5Y9P8_LIGJA	no	no	2									2										0	0	0	0	0	0	0	0	0	0	0	0	0	0	0	0	0	0
LPVPAFN	7	756.417	tr|A0A7D0LW52|A0A7D0LW52_OLEEU	tr|A0A7D0LW52|A0A7D0LW52_OLEEU	yes	yes	1		1		1	1	1	1		1	1	1	1	1	1	1			1	0	1993500	0	499290	843310	646150	608450	0	819740	483970	1106800	759460	404810	588310	764870	0	0	287720
LSLIRALFY	9	1094.65	tr|A0A1D5AHZ7|A0A1D5AHZ7_OLEEU	tr|A0A1D5AHZ7|A0A1D5AHZ7_OLEEU	yes	yes	2																1			0	0	0	0	0	0	0	0	0	0	0	0	0	0	0	142810	0	0
LSPERKMSAPLG	12	1284.69	tr|A0A2H4V542|A0A2H4V542_9LAMI;tr|A0A2H4V4W4|A0A2H4V4W4_OLEEU;tr|A0A2H4V4P2|A0A2H4V4P2_OLEEU;tr|A0A2H4V4L4|A0A2H4V4L4_OLEEU;tr|A0A2H4V491|A0A2H4V491_OLEEU	tr|A0A2H4V542|A0A2H4V542_9LAMI	yes	no	2	3	1	1	1	1	1	1	2	2	1	1	1	1		2				83807000	245120000	259350000	601690	1959600	1607200	146490000	177810000	223220000	898870	1769700	2746200	207800000	0	184190000	0	0	0
LVDPDGAMRQ	10	1100.53	tr|A0A088N5S1|A0A088N5S1_9LAMI	tr|A0A088N5S1|A0A088N5S1_9LAMI	yes	yes	2																	1		0	0	0	0	0	0	0	0	0	0	0	0	0	0	0	0	0	0
LVDTGREQA	9	987.499	tr|A0A2H4V542|A0A2H4V542_9LAMI;tr|A0A2H4V4W4|A0A2H4V4W4_OLEEU;tr|A0A2H4V4P2|A0A2H4V4P2_OLEEU;tr|A0A2H4V4L4|A0A2H4V4L4_OLEEU;tr|A0A2H4V491|A0A2H4V491_OLEEU;tr|A0A2H4V554|A0A2H4V554_9LAMI;tr|A0A2H4V551|A0A2H4V551_9LAMI;tr|A0A2H4V549|A0A2H4V549_9LAMI;tr|A0A2H4V540|A0A2H4V540_9LAMI;tr|A0A2H4V527|A0A2H4V527_9LAMI;tr|A0A2H4V427|A0A2H4V427_9LAMI;tr|A0A1C9IAJ1|A0A1C9IAJ1_9LAMI;tr|A0A6B9DE00|A0A6B9DE00_9L…	tr|A0A2H4V542|A0A2H4V542_9LAMI	yes	no	2		1					1	1					1	1					0	4114900	0	0	0	0	190610	2479300	0	0	0	0	323770	2977300	0	0	0	0
NHLDRETNP	9	1094.51	tr|A0A4D5Y9P8|A0A4D5Y9P8_LIGJA	tr|A0A4D5Y9P8|A0A4D5Y9P8_LIGJA	no	no	3																1			0	0	0	0	0	0	0	0	0	0	0	0	0	0	0	553400	0	0
NLDFLEMWR	9	1222.58	tr|A0A411AR71|A0A411AR71_9LAMI	tr|A0A411AR71|A0A411AR71_9LAMI	yes	yes	3					1	1												1	0	0	0	0	80776	82465	0	0	0	0	0	0	0	0	0	0	0	43425
NQERWFFPE	9	1251.57	tr|A0A4D5Y9P8|A0A4D5Y9P8_LIGJA	tr|A0A4D5Y9P8|A0A4D5Y9P8_LIGJA	yes	yes	3		1	1						1										0	224850	226410	0	0	0	0	0	173430	0	0	0	0	0	0	0	0	0
NQIPLSGPH	9	961.498	tr|A0A0U4AVG8|A0A0U4AVG8_9LAMI	tr|A0A0U4AVG8|A0A0U4AVG8_9LAMI	yes	yes	2				1	1	1				1	1						1	1	0	0	0	878870	5276700	5351200	0	0	0	1039200	2711300	0	0	0	0	0	2423700	2044700
PLNLVLHFF	9	1098.62	tr|A0A2U8U7L2|A0A2U8U7L2_9LAMI	tr|A0A2U8U7L2|A0A2U8U7L2_9LAMI	yes	yes	2				2	1	2				3	2	2					1	1	0	0	0	3423500	5494800	6490500	0	0	0	4650900	7451200	5699800	0	0	0	0	3880600	1974000
PLYKFEWHP	9	1215.61	tr|A0A7S6AKL5|A0A7S6AKL5_OLEEU	tr|A0A7S6AKL5|A0A7S6AKL5_OLEEU	yes	yes	2	1																		227060	0	0	0	0	0	0	0	0	0	0	0	0	0	0	0	0	0
PSEPLFVARPGA	12	1239.66	tr|A0A7S6AKL5|A0A7S6AKL5_OLEEU	tr|A0A7S6AKL5|A0A7S6AKL5_OLEEU	yes	yes	2	1		1			1			1			1							119830	0	0	0	0	1785700	0	0	0	0	0	0	0	0	0	0	0	0
PSPILFYPI	9	1045.58	tr|A0A2U8U7L2|A0A2U8U7L2_9LAMI	tr|A0A2U8U7L2|A0A2U8U7L2_9LAMI	yes	yes	1				1						1		1					2	2	0	0	0	308380	0	0	0	0	0	249090	0	698610	0	0	0	0	650920	301730
REQAKRVVR	9	1140.68	tr|A0A2H4V542|A0A2H4V542_9LAMI;tr|A0A2H4V4W4|A0A2H4V4W4_OLEEU;tr|A0A2H4V4P2|A0A2H4V4P2_OLEEU;tr|A0A2H4V4L4|A0A2H4V4L4_OLEEU;tr|A0A2H4V491|A0A2H4V491_OLEEU;tr|A0A2H4V554|A0A2H4V554_9LAMI;tr|A0A2H4V551|A0A2H4V551_9LAMI;tr|A0A2H4V549|A0A2H4V549_9LAMI;tr|A0A2H4V540|A0A2H4V540_9LAMI;tr|A0A2H4V527|A0A2H4V527_9LAMI;tr|A0A2H4V427|A0A2H4V427_9LAMI;tr|A0A1C9IAJ1|A0A1C9IAJ1_9LAMI;tr|A0A6B9DE00|A0A6B9DE00_9L…	tr|A0A2H4V542|A0A2H4V542_9LAMI	yes	no	3				1	1					1	1								0	0	0	17472	246840	0	0	0	0	26166	149170	0	0	0	0	0	0	0
RKIKLFLIL	9	1142.79	tr|A0A4D5Y9P8|A0A4D5Y9P8_LIGJA	tr|A0A4D5Y9P8|A0A4D5Y9P8_LIGJA	yes	yes	2	1						1						1						455070	0	0	0	0	0	72028	0	0	0	0	0	74704	0	0	0	0	0
RLQGGANIV	9	926.53	tr|A0A1D5AHZ7|A0A1D5AHZ7_OLEEU	tr|A0A1D5AHZ7|A0A1D5AHZ7_OLEEU	yes	yes	2								1											0	0	0	0	0	0	0	3046000	0	0	0	0	0	0	0	0	0	0
RVLPDGSLM	9	986.522	tr|Q8GVC8|Q8GVC8_OLEEU	tr|Q8GVC8|Q8GVC8_OLEEU	yes	yes	2		1	1		1	1		1			1	1		1				1	0	1502400	931270	0	2123500	2530900	0	413650	0	0	3018700	3037400	0	650600	0	0	0	1008700
SDPDDLGKGGHE	12	1225.52	tr|A0A0U4AVG8|A0A0U4AVG8_9LAMI	tr|A0A0U4AVG8|A0A0U4AVG8_9LAMI	yes	yes	2;3		2	2				2	2	2					1	2				0	530880	503760	0	0	0	29374	430550	291490	0	0	0	0	64909	86564	0	0	0
SDPDDLGKGGHEL	13	1338.61	tr|A0A0U4AVG8|A0A0U4AVG8_9LAMI	tr|A0A0U4AVG8|A0A0U4AVG8_9LAMI	yes	yes	3			1					1	1				1		1				0	0	1503600	0	0	0	0	1412000	839740	0	0	0	63790	0	518050	0	0	0
SERIIPGYGGGM	12	1235.6	tr|Q8GVC8|Q8GVC8_OLEEU	tr|Q8GVC8|Q8GVC8_OLEEU	yes	yes	2			1				1						1	1	1				0	0	2331000	0	0	0	1110500	0	0	0	0	0	1114300	1521600	1440700	0	0	0
SETEFPKDW	9	1137.5	tr|A0A4D5Y9P8|A0A4D5Y9P8_LIGJA	tr|A0A4D5Y9P8|A0A4D5Y9P8_LIGJA	no	no	3												1							0	0	0	0	0	0	0	0	0	0	0	7358.8	0	0	0	0	0	0
SLGAAVIYDQHE	12	1301.63	tr|A0A1D5AHZ8|A0A1D5AHZ8_OLEEU	tr|A0A1D5AHZ8|A0A1D5AHZ8_OLEEU	yes	yes	3									1										0	0	0	0	0	0	0	0	0	0	0	0	0	0	0	0	0	0
SLVPIGRGQ	9	925.535	tr|A0A2H4V4Y7|A0A2H4V4Y7_9LAMI;tr|A5JW39|A5JW39_OLEEU;tr|A5JW37|A5JW37_OLEEU;tr|Q5S815|Q5S815_SYRVU;tr|A0A6B9D9J3|A0A6B9D9J3_9LAMI;tr|A0A2H4V504|A0A2H4V504_9LAMI;tr|A0A2H4V4Y1|A0A2H4V4Y1_SYRVU;tr|A0A2H4V4X9|A0A2H4V4X9_9LAMI;tr|A0A2H4V4X4|A0A2H4V4X4_9LAMI;tr|A0A2H4V4X2|A0A2H4V4X2_9LAMI;tr|A0A2H4V4X1|A0A2H4V4X1_9LAMI;tr|A0A2H4V4W1|A0A2H4V4W1_OLEEU;tr|A0A2H4V4V5|A0A2H4V4V5_9LAMI;tr|A0A2H4V4Q2|A0A2H4…	tr|A0A2H4V4Y7|A0A2H4V4Y7_9LAMI	yes	no	2			1																0	0	254560	0	0	0	0	0	0	0	0	0	0	0	0	0	0	0
SRYDQGGGM	9	969.397	tr|Q8LGL8|Q8LGL8_OLEEU	tr|Q8LGL8|Q8LGL8_OLEEU	yes	yes	2		1	1		1		1	1					1	1	1			1	0	1889000	1969300	0	87895	0	84535	1021600	0	0	0	0	73548	1569900	964600	0	0	22151
SRYDQGGGMK	10	1097.49	tr|Q8LGL8|Q8LGL8_OLEEU	tr|Q8LGL8|Q8LGL8_OLEEU	yes	yes	2		1	1	1	1	1	1	1	1					1	1			1	0	684830	874580	7522.6	0	116210	35598	361840	280530	0	0	0	0	339040	232070	0	0	63040
SSDTIDNVKAK	11	1176.6	tr|Q944F7|Q944F7_OLEEU;tr|Q944F6|Q944F6_OLEEU	tr|Q944F7|Q944F7_OLEEU	yes	no	2		1	1				1	1	1		1	1		1	1				0	170330	210680	0	0	0	22126	119000	77397	0	11272	32426	0	50235	35857	0	0	0
STGPHFDPV	9	955.44	tr|A9LMI3|A9LMI3_OLEEU	tr|A9LMI3|A9LMI3_OLEEU	yes	yes	2		1	1				1	1	1				1	1					0	1298300	4713300	0	0	0	2664400	5024700	5811400	0	0	0	715070	9768700	0	0	0	0
SYTTNCLAP	9	968.427	tr|A0A0U2M8C0|A0A0U2M8C0_9LAMI	tr|A0A0U2M8C0|A0A0U2M8C0_9LAMI	yes	yes	1								1	1										0	0	0	0	0	0	0	175580	186250	0	0	0	0	0	0	0	0	0
TQSRYDQGGGM	11	1198.5	tr|Q8LGL8|Q8LGL8_OLEEU	tr|Q8LGL8|Q8LGL8_OLEEU	yes	yes	2		1						1						1					0	982420	0	0	0	0	0	286130	0	0	0	0	0	345310	0	0	0	0
TQSRYDQGGGMK	12	1326.6	tr|Q8LGL8|Q8LGL8_OLEEU	tr|Q8LGL8|Q8LGL8_OLEEU	yes	yes	2		1	1					1	1						1				0	271810	336300	0	0	0	0	127120	54895	0	0	0	0	0	34986	0	0	0
VEEGNVLQIR	10	1155.62	tr|E1UIZ9|E1UIZ9_OLEEU	tr|E1UIZ9|E1UIZ9_OLEEU	yes	yes	2																1	1		0	0	0	0	0	0	0	0	0	0	0	0	0	0	0	1301200	1228000	0
VESSDTIDNVKAK	13	1404.71	tr|Q944F7|Q944F7_OLEEU;tr|Q944F6|Q944F6_OLEEU	tr|Q944F7|Q944F7_OLEEU	yes	no	2;3		2	2				2	2	2				1		2				0	752300	872890	0	0	0	70070	1044600	740810	0	0	0	9474.7	0	207930	0	0	0
VGTWVPAVN	9	941.497	tr|Q8GVC8|Q8GVC8_OLEEU	tr|Q8GVC8|Q8GVC8_OLEEU	yes	yes	2					1					1	1	1				1	1	1	0	0	0	0	252180	0	0	0	0	4618.2	41318	119680	0	0	0	32697	24509	29122
VHEPMQTGL	9	1010.49	tr|A0A2H4V4Y7|A0A2H4V4Y7_9LAMI;tr|A5JW39|A5JW39_OLEEU;tr|A5JW37|A5JW37_OLEEU;tr|Q5S815|Q5S815_SYRVU;tr|A0A6B9D9J3|A0A6B9D9J3_9LAMI;tr|A0A2H4V504|A0A2H4V504_9LAMI;tr|A0A2H4V4Y1|A0A2H4V4Y1_SYRVU;tr|A0A2H4V4X9|A0A2H4V4X9_9LAMI;tr|A0A2H4V4X4|A0A2H4V4X4_9LAMI;tr|A0A2H4V4X2|A0A2H4V4X2_9LAMI;tr|A0A2H4V4X1|A0A2H4V4X1_9LAMI;tr|A0A2H4V4W1|A0A2H4V4W1_OLEEU;tr|A0A2H4V4V5|A0A2H4V4V5_9LAMI;tr|A0A2H4V4Q2|A0A2H4…	tr|A0A2H4V4Y7|A0A2H4V4Y7_9LAMI	yes	no	1											1					1	1		0	0	0	0	0	0	0	0	0	0	187610	0	0	0	0	91999	254630	0
VQIVGDDLLVTNPK	14	1509.84	tr|A0A7D0LW52|A0A7D0LW52_OLEEU	tr|A0A7D0LW52|A0A7D0LW52_OLEEU	yes	yes	2			1				1	1	1				1		1				0	0	11959000	0	0	0	1614000	1559200	1408900	0	0	0	299760	0	243860	0	0	0
VQVHTQSRY	9	1116.57	tr|Q8LGL8|Q8LGL8_OLEEU	tr|Q8LGL8|Q8LGL8_OLEEU	yes	yes	2						1				1		1							0	0	0	0	0	1078700	0	0	0	1195100	0	1782800	0	0	0	0	0	0
VSNWDDMEKIWH	12	1558.69	tr|A0A097CPF6|A0A097CPF6_9LAMI	tr|A0A097CPF6|A0A097CPF6_9LAMI	yes	yes	2									1										0	0	0	0	0	0	0	0	0	0	0	0	0	0	0	0	0	0
VVDLTVR	7	800.476	tr|A0A0U2M8C0|A0A0U2M8C0_9LAMI;tr|A0A0U2LDZ7|A0A0U2LDZ7_9LAMI;tr|A0A0U2TI91|A0A0U2TI91_9LAMI;tr|A0A0A0V0V0|A0A0A0V0V0_9LAMI	tr|A0A0U2M8C0|A0A0U2M8C0_9LAMI	no	no	1												1							0	0	0	0	0	0	0	0	0	0	0	175050	0	0	0	0	0	0
VWGLETELP	9	1042.53	tr|A0A4D5Y9P8|A0A4D5Y9P8_LIGJA	tr|A0A4D5Y9P8|A0A4D5Y9P8_LIGJA	no	no	2																1			0	0	0	0	0	0	0	0	0	0	0	0	0	0	0	165310	0	0
VYNVEPETLR	10	1218.62	sp|C0HK96|Y0001_OLEEU	sp|C0HK96|Y0001_OLEEU	yes	yes	2				1	1	1				1	1	1				1	1	1	0	0	0	1612000	8050900	7485400	0	0	0	2336300	15745000	9579900	0	0	0	3781100	2552200	2261500
YHDPPPAPL	9	1005.49	tr|A0A1D5AHZ8|A0A1D5AHZ8_OLEEU	tr|A0A1D5AHZ8|A0A1D5AHZ8_OLEEU	no	no	2	1	1						1	1					1	1				500180	503880	0	0	0	0	0	353770	336500	0	0	0	0	72759	226780	0	0	0
YLSQAYVFY	9	1152.55	tr|A0A4D5Y9P8|A0A4D5Y9P8_LIGJA	tr|A0A4D5Y9P8|A0A4D5Y9P8_LIGJA	no	no	2					1			1											0	0	0	0	265790	0	0	1978800	0	0	0	0	0	0	0	0	0	0
YQPEEIFYGDGEPEIR	16	1940.88	tr|V6BNU1|V6BNU1_OLEEU	tr|V6BNU1|V6BNU1_OLEEU	yes	yes	2				1						1									0	0	0	1985900	0	0	0	0	0	1273800	0	0	0	0	0	0	0	0

## Sheet: Table SY
Name (3 Letter Code, Ile/Leu = Xle)	Name (1 Letter Code, I/L = J)	Name (1 Letter Code, J = L)	Name (1 Letter Code, J = I)	RT (min)	Molecular Formula	Molecular Weight	Adduct	F1: Frantoio Alcalase	F2: Frantoio Papaina	L1: Leccino Alcalase	L2: Leccino Papaina	M1: Moraiolo Alcalase	M2: Moraiolo Papaina
Val-Gly	VG	VG	VG	1.553	C7H14N2O3	174.1	[M+H]+	7.60887e+06	8.00749e+07	9.17882e+06	6.9709e+07	6.93295e+06	5.74625e+07
Pro-Ala	PA	PA	PA	0.965	C8H14N2O3	186.1	[M+H]+	9.05527e+07	4.8822e+06	7.01934e+07	8.13419e+06	1.4133e+08	6.67557e+06
Xle-Gly	JG	LG	IG	4.166	C8H16N2O3	188.115	[M+H]+	1.71185e+07	3.41697e+08	1.62707e+07	3.26177e+08	2.09615e+07	3.12259e+08
Xle-Gly	JG	LG	IG	3.755	C8H16N2O3	188.115	[M+H]+	2.40909e+07	2.66523e+08	2.56828e+07	2.58026e+08	2.1156e+07	2.60036e+08
Val-Ala	VA	VA	VA	1.485	C8H16N2O3	188.115	[M+H]+	6.30418e+08	8.45942e+08	6.4949e+08	7.00789e+08	5.82742e+08	7.46669e+08
Ala-Val	AV	AV	AV	2.144	C8H16N2O3	188.115	[M+H]+	4.01179e+08	5.51297e+07	3.98334e+08	3.8902e+07	3.20629e+08	3.29196e+07
Gly-Xle	GJ	GL	GI	5.714	C8H16N2O3	188.115	[M+H]+	1.14893e+09	2.05087e+07	1.00777e+09	4.77135e+07	8.39585e+08	1.95144e+07
Ala-Thr	AT	AT	AT	0.84	C7H14N2O4	190.094	[M+H]+	1.59645e+08	8.17492e+07	1.19246e+08	7.06822e+07	1.83958e+08	6.65816e+07
Xle-Ala	JA	LA	IA	3.955	C9H18N2O3	202.131	[M+H]+	1.62493e+09	7.90373e+08	1.73381e+09	7.30662e+08	1.37478e+09	6.66091e+08
Xle-Ala	JA	LA	IA	3.572	C9H18N2O3	202.131	[M+H]+	2.2083e+08	8.45038e+07	2.61744e+08	9.39992e+07	1.49597e+08	6.06693e+07
Ala-Xle	AJ	AL	AI	4.893	C9H18N2O3	202.131	[M+H]+	8.56457e+07	1.73647e+07	8.66384e+07	1.52565e+07	7.34433e+07	1.62486e+07
Ala-Xle	AJ	AL	AI	5.461	C9H18N2O3	202.131	[M+H]+	1.57361e+09	1.83779e+06	1.65046e+09	1.91259e+06	1.44309e+09	1.82358e+06
Val-Ser	VS	VS	VS	0.985	C8H16N2O4	204.11	[M+H]+	2.48183e+08	4.66904e+08	2.3963e+08	4.1474e+08	2.61579e+08	4.34923e+08
Ser-Val	SV	SV	SV	2.023	C8H16N2O4	204.11	[M+H]+	1.5698e+08	9.31656e+06	1.64245e+08	1.0247e+07	1.4089e+08	7.52344e+06
Gly-Met	GM	GM	GM	2.569	C7H14N2O3S	206.072	[M+H]+	7.55176e+07	2.58815e+06	7.69268e+07	4.28514e+06	6.71251e+07	2.56502e+06
Val-Val	VV	VV	VV	4.494	C10H20N2O3	216.146	[M+H]+	3.58551e+08	1.44723e+08	3.6182e+08	1.1578e+08	2.7698e+08	1.42997e+08
Gln-Ala	QA	QA	QA	0.905	C8H15N3O4	217.105	[M+H]+	1.29121e+08	2.24426e+06	9.81513e+07	4.53013e+06	1.03643e+08	2.54786e+06
Ala-Lys	AK	AK	AK	0.774	C9H19N3O3	217.142	[M+H]+	3.67404e+08	2.70939e+07	1.2557e+08	3.30441e+07	2.8054e+07	2.04914e+07
Lys-Ala	KA	KA	KA	0.799	C9H19N3O3	217.142	[M+H]+	2.85768e+08	2.70939e+07	3.08924e+08	3.30441e+07	2.04073e+08	2.04914e+07
Ala-Glu	AE	AE	AE	0.831	C8H14N2O5	218.089	[M+H]+	1.16142e+08	3.26988e+07	1.03777e+08	5.17085e+07	1.13372e+08	3.97473e+07
Xle-Ser	JS	LS	IS	2.13	C9H18N2O4	218.126	[M+H]+	2.04979e+08	7.36727e+08	1.99451e+08	6.17175e+08	2.09788e+08	6.70933e+08
Xle-Ser	JS	LS	IS	1.953	C9H18N2O4	218.126	[M+H]+	7.30614e+08	1.53311e+08	6.96064e+08	1.61502e+08	7.3327e+08	1.44587e+08
Val-Thr	VT	VT	VT	1.153	C9H18N2O4	218.126	[M+H]+	3.48252e+08	9.42058e+07	2.85578e+08	8.75389e+07	3.3337e+08	8.23305e+07
Ser-Xle	SJ	SL	SI	5.08	C9H18N2O4	218.126	[M+H]+	2.98022e+09	2.16933e+08	3.08677e+09	4.0746e+06	1.77727e+09	2.23505e+06
Met-Ala	MA	MA	MA	2.23	C8H16N2O3S	220.087	[M+H]+	9.68769e+07	4.2624e+07	1.1995e+08	3.68699e+07	8.09522e+07	3.71558e+07
Ala-Met	AM	AM	AM	2.684	C8H16N2O3S	220.087	[M+H]+	6.65085e+08	1.30256e+08	6.51355e+08	1.30644e+08	6.22387e+08	1.12695e+08
Gly-Phe	GF	GF	GF	7.099	C11H14N2O3	222.099	[M+H]+	6.79631e+08	4.59577e+07	5.57707e+08	6.15876e+07	6.22387e+08	4.35049e+07
Ala-His	AH	AH	AH	0.757	C9H14N4O3	226.105	[M+H]+	2.56602e+08	5.8559e+07	2.1681e+08	5.61814e+07	2.31839e+08	6.7186e+07
Val-Xle	VJ	VL	VI	7.767	C11H22N2O3	230.162	[M+H]+	4.49168e+09	5.16591e+08	4.71658e+09	5.67037e+08	4.0127e+09	4.71987e+08
Xle-Val	JV	LV	IV	6.491	C11H22N2O3	230.162	[M+H]+	2.86013e+09	4.88871e+07	2.79779e+09	1.03973e+08	2.67251e+09	4.90617e+07
Val-Xle	VJ	VL	VI	7.006	C11H22N2O3	230.162	[M+H]+	4.17092e+07	1.23496e+08	4.82138e+07	9.5247e+07	3.64965e+07	1.23594e+08
Xle-Val	JV	LV	IV	7.2	C11H22N2O3	230.162	[M+H]+	2.21535e+08	6.12206e+07	1.9717e+08	5.18926e+07	1.76636e+08	6.37319e+07
Val-Asn	VN	VN	VN	0.923	C9H17N3O4	231.121	[M+H]+	6.99463e+07	2.19707e+07	7.5279e+07	2.60333e+07	6.77964e+07	2.27831e+07
Thr-Xle	TJ	TL	TI	2.793	C10H20N2O4	232.141	[M+H]+	1.20145e+08	1.74141e+08	1.37629e+08	1.61386e+08	1.05769e+08	1.57575e+08
Thr-Xle	TJ	TL	TI	2.369	C10H20N2O4	232.141	[M+H]+	1.61861e+08	1.50483e+08	1.50034e+08	1.46134e+08	1.78094e+08	1.21272e+08
Ser-Glu	SE	SE	SE	0.736	C8H14N2O6	234.084	[M+H]+	5.49131e+06	4.86731e+06	3.85663e+07	1.05624e+07	6.18564e+06	3.81076e+06
Gln-Gln	QQ	QQ	QQ	0.722	C10H18N4O5	274.126	[M+H]+	4.04152e+08	1.24412e+07	3.27514e+08	1.73279e+07	4.08321e+08	1.0529e+07
Gln-Glu	QE	QE	QE	0.836	C10H17N3O6	275.11	[M+H]+	1.03833e+08	3.53621e+06	6.9659e+07	1.71609e+07	6.99562e+07	7.12762e+06
Val-Ala-Ser	VAS	VAS	VAS	1.505	C11H21N3O5	275.147	[M+H]+	5.76573e+07	7.6449e+07	5.90074e+07	7.63266e+07	5.10282e+07	7.51174e+07
Tyr-Pro	YP	YP	YP	6.576	C14H18N2O4	278.125	[M+H]+	2.77221e+07	6.27084e+06	1.64983e+07	4.40924e+06	7.83333e+07	8.28208e+06
Phe-Asn	FN	FN	FN	3.728	C13H17N3O4	279.121	[M+H]+	1.83253e+08	7.61523e+07	1.70385e+08	6.36435e+07	1.6044e+08	6.59261e+07
Gly-Gly-Phe	GGF	GGF	GGF	7.301	C13H17N3O4	279.121	[M+H]+	9.07365e+07	175495	8.00984e+07	237535	9.69723e+07	274985
Val-Tyr	VY	VY	VY	5.886	C14H20N2O4	280.141	[M+H]+	7.26712e+08	1.00652e+08	7.87706e+08	1.11731e+08	7.69166e+08	1.00836e+08
His-Gln	HQ	HQ	HQ	0.746	C11H17N5O4	283.127	[M+H]+	9.51172e+07	7.2828e+06	6.73607e+07	7.07747e+06	8.78679e+07	8.34955e+06
Val-Pro-Ala	VPA	VPA	VPA	4.739	C13H23N3O4	285.167	[M+H]+	2.07458e+06	1.56083e+08	2.84707e+06	1.46881e+08	2.11831e+06	1.14999e+08
Gly-Val-Xle	GVJ	GVL	GVI	9.716	C13H25N3O4	287.183	[M+H]+	4.76176e+08	4.71255e+08	3.90199e+08	4.72018e+08	3.95895e+08	4.26642e+08
Val-Ala-Val	VAV	VAV	VAV	7.727	C13H25N3O4	287.183	[M+H]+	1.07736e+09	1.32664e+07	1.27476e+09	2.93141e+07	9.88785e+08	1.5414e+07
Ala-Val-Val	AVV	AVV	AVV	7.326	C13H25N3O4	287.183	[M+H]+	1.40131e+08	2.63552e+07	1.33065e+08	2.14077e+07	1.32489e+08	1.66225e+07
Xle-Arg	JR	LR	IR	4.87	C12H25N5O3	287.194	[M+H]+	8.98456e+07	2.37112e+07	1.2609e+08	2.29406e+07	1.51073e+08	2.04116e+07
Gln-Phe	QF	QF	QF	6.979	C14H19N3O4	293.136	[M+H]+	1.41833e+09	6.86956e+07	1.53749e+09	7.14071e+07	1.30217e+09	6.34104e+07
Phe-Lys	FK	FK	FK	4.682	C15H23N3O3	293.173	[M+H]+	6.49394e+07	8.76515e+07	5.24276e+07	8.88312e+07	5.93362e+07	1.28767e+08
Lys-Phe	KF	KF	KF	6.563	C15H23N3O3	293.173	[M+H]+	9.88802e+08	336001	1.06325e+09	434344	8.32114e+08	369961
Xle-Tyr	JY	LY	IY	7.962	C15H22N2O4	294.157	[M+H]+	6.68599e+08	9.9412e+07	6.48305e+08	9.47478e+07	5.75243e+08	8.95345e+07
Tyr-Xle	YJ	YL	YI	9.083	C15H22N2O4	294.157	[M+H]+	5.35793e+08	3.54731e+07	5.41292e+08	4.21182e+07	5.2001e+08	3.16224e+07
Xle-Tyr	JY	LY	IY	7.502	C15H22N2O4	294.157	[M+H]+	1.35935e+09	7.71144e+07	1.29376e+09	9.48725e+07	1.40041e+09	8.49058e+07
Tyr-Asn	YN	YN	YN	1.48	C13H17N3O5	295.115	[M+H]+	1.1036e+08	1.22836e+07	1.33235e+08	1.2427e+07	9.48864e+07	9.35245e+06
Met-Phe	MF	MF	MF	10.803	C14H20N2O3S	296.118	[M+H]+	1.06549e+08	3.81341e+07	1.19735e+08	4.11847e+07	7.1627e+07	4.8627e+07
Xle-Pro-Ala	JPA	LPA	IPA	6.659	C14H25N3O4	299.183	[M+H]+	7.12511e+06	2.94511e+08	6.54082e+06	2.87621e+08	9.03183e+06	2.92088e+08
Xle-Pro-Ala	JPA	LPA	IPA	7.202	C14H25N3O4	299.183	[M+H]+	5.57192e+06	2.42217e+08	8.39185e+06	2.29541e+08	6.21086e+06	2.4192e+08
Gly-Gln-Pro	GQP	GQP	GQP	1.75	C12H20N4O5	300.142	[M+H]+	4.7689e+07	2.21786e+06	4.84404e+07	2.20522e+06	4.90305e+07	1.81236e+06
Val-Xle-Ala	VJA	VLA	VIA	6.815	C14H27N3O4	301.199	[M+H]+	1.09093e+08	2.3357e+07	1.00143e+08	1.99946e+07	1.34491e+08	1.81733e+07
Gly-Xle-Xle	GJJ	GLL	GII	11.817	C14H27N3O4	301.199	[M+H]+	9.57113e+08	5.70599e+07	8.11605e+08	6.21222e+07	8.41796e+08	5.451e+07
Val-Xle-Ala	VJA	VLA	VIA	7.19	C14H27N3O4	301.199	[M+H]+	5.08116e+07	1.65624e+08	4.94275e+07	1.21093e+08	4.05007e+07	1.50182e+08
Gly-Xle-Xle	GJJ	GLL	GII	12.377	C14H27N3O4	301.199	[M+H]+	6.03635e+08	3.82704e+07	5.05095e+08	3.75065e+07	4.73748e+08	3.25259e+07
Xle-Val-Ala	JVA	LVA	IVA	7.576	C14H27N3O4	301.199	[M+H]+	2.05124e+07	1.72036e+08	2.11669e+07	1.49841e+08	1.30529e+07	1.27622e+08
Ala-Val-Xle	AVJ	AVL	AVI	9.721	C14H27N3O4	301.199	[M+H]+	8.78397e+07	9.84532e+07	1.04233e+08	9.93053e+07	5.7261e+07	7.09569e+07
Xle-Xle-Gly	JJG	LLG	IIG	8.814	C14H27N3O4	301.199	[M+H]+	930295	1.26096e+08	662409	1.14146e+08	1.44827e+06	1.12508e+08
Phe-His	FH	FH	FH	6.496	C15H18N4O3	302.136	[M+H]+	1.38771e+08	95082.1	1.43377e+08	104292	1.0827e+08	111277
Val-Asn-Ala	VNA	VNA	VNA	2.858	C12H22N4O5	302.158	[M+H]+	1.95681e+08	1.17441e+08	2.37933e+08	1.10673e+08	1.83413e+08	1.10137e+08
Ala-Gly-Arg	AGR	AGR	AGR	0.934	C11H22N6O4	302.169	[M+H]+	9.30406e+07	4.25242e+07	8.29147e+07	3.87544e+07	1.20837e+08	3.51514e+07
Gln-Arg	QR	QR	QR	0.838	C11H22N6O4	302.169	[M+H]+	1.09082e+08	2.70913e+07	8.90375e+07	3.87544e+07	1.06252e+08	3.51514e+07
Arg-Glu	RE	RE	RE	0.931	C11H21N5O5	303.153	[M+H]+	1.9909e+08	1.06209e+07	1.98646e+08	2.61282e+07	1.73546e+08	9.44939e+06
Xle-Ala-Thr	JAT	LAT	IAT	5.835	C13H25N3O5	303.178	[M+H]+	8.71111e+06	3.52939e+08	7.71229e+06	3.30464e+08	8.40641e+06	3.39334e+08
Xle-Thr-Ala	JTA	LTA	ITA	6.471	C13H25N3O5	303.178	[M+H]+	1.35248e+07	2.57558e+08	1.44839e+07	2.43911e+08	1.60778e+07	2.44503e+08
Ala-Thr-Xle	ATJ	ATL	ATI	7.39	C13H25N3O5	303.178	[M+H]+	8.18726e+08	5.8527e+07	9.41831e+08	6.3661e+07	7.10624e+08	5.70594e+07
Ala-Ser-Glu	ASE	ASE	ASE	0.927	C11H19N3O7	305.121	[M+H]+	7.18734e+07	1.67692e+07	6.56138e+07	7.71844e+06	5.78996e+07	7.97203e+06
Met-Arg	MR	MR	MR	2.339	C11H23N5O3S	305.151	[M+H]+	1.32594e+08	2.54312e+07	1.16125e+08	2.51847e+07	1.36532e+08	4.9158e+07
Ser-Xle-Ser	SJS	SLS	SIS	3.848	C12H23N3O6	305.157	[M+H]+	5.68443e+06	2.38633e+08	6.01933e+06	1.64144e+08	5.66945e+06	1.13044e+08
Ser-Ser-Xle	SSJ	SSL	SSI	5.914	C12H23N3O6	305.157	[M+H]+	7.14764e+07	9.53802e+07	7.85927e+07	9.19538e+07	6.35268e+07	9.01094e+07
Ala-Ala-Phe	AAF	AAF	AAF	8.717	C15H21N3O4	307.152	[M+H]+	1.80587e+07	1.58026e+08	1.75816e+07	1.41012e+08	1.1621e+07	1.46136e+08
Ala-Tyr-Gly	AYG	AYG	AYG	4.309	C14H19N3O5	309.131	[M+H]+	112547	5.80521e+06	98806.6	5.77753e+06	95586.7	4.72405e+06
Ala-Gly-Tyr	AGY	AGY	AGY	5.361	C14H19N3O5	309.131	[M+H]+	6.61792e+07	2.10972e+06	6.4104e+07	2.57899e+06	6.91201e+07	2.09545e+06
Gln-Tyr	QY	QY	QY	4.423	C14H19N3O5	309.131	[M+H]+	1.4052e+08	1.70395e+06	1.46276e+08	3.94079e+06	1.46033e+08	1.95858e+06
Lys-Tyr	KY	KY	KY	4.032	C15H23N3O4	309.167	[M+H]+	2.54208e+08	4.99667e+06	2.69405e+08	1.51876e+07	1.69916e+08	321908
Met-Tyr	MY	MY	MY	7.029	C14H20N2O4S	312.113	[M+H]+	6.60674e+07	4.08955e+07	8.41927e+07	5.17717e+07	3.9762e+07	6.59596e+07
Phe-Phe	FF	FF	FF	12.958	C18H20N2O3	312.146	[M+H]+	1.43572e+08	3.17343e+08	1.39975e+08	2.2982e+08	1.24112e+08	2.9076e+08
Xle-Pro-Ser	JPS	LPS	IPS	6.719	C14H25N3O5	315.178	[M+H]+	1.96866e+07	1.04845e+08	3.0578e+07	1.28944e+08	1.79089e+07	8.7847e+07
Ser-Pro-Xle	SPJ	SPL	SPI	8.097	C14H25N3O5	315.178	[M+H]+	1.24604e+08	5.5676e+07	1.06081e+08	5.12073e+07	9.60012e+07	4.41646e+07
Xle-Ala-Xle	JAJ	LAL	IAI	12.493	C15H29N3O4	315.214	[M+H]+	3.46348e+07	1.29402e+08	3.03152e+07	1.26287e+08	2.77962e+07	1.03682e+08
Ala-Xle-Xle	AJJ	ALL	AII	11.749	C15H29N3O4	315.214	[M+H]+	1.62923e+08	1.59512e+08	1.54946e+08	1.75451e+08	1.6477e+08	1.53364e+08
Val-Ala-Gln	VAQ	VAQ	VAQ	1.699	C13H24N4O5	316.173	[M+H]+	4.74341e+08	5.09983e+07	4.15369e+08	4.96643e+07	3.39631e+08	3.64547e+07
Gln-Gly-Xle	QGJ	QGL	QGI	6.892	C13H24N4O5	316.173	[M+H]+	3.60351e+08	2.97903e+06	3.48881e+08	7.09312e+06	3.39488e+08	4.03134e+06
Ala-Gly-Val-Ala	AGVA	AGVA	AGVA	4.296	C13H24N4O5	316.173	[M+H]+	6.15854e+07	5.2945e+07	7.18541e+07	4.08167e+07	7.50563e+07	5.00136e+07
Gln-Gly-Xle	QGJ	QGL	QGI	6.984	C13H24N4O5	316.173	[M+H]+	993394	2.97903e+06	593883	7.09312e+06	3.39488e+08	4.03134e+06
Ala-Ala-Arg	AAR	AAR	AAR	0.974	C12H24N6O4	316.184	[M+H]+	9.44193e+07	2.44027e+08	7.99049e+07	1.8366e+08	7.05563e+07	2.18772e+08
Lys-Val-Ala	KVA	KVA	KVA	2.7	C14H28N4O4	316.21	[M+H]+	2.65945e+07	2.93118e+08	3.10471e+07	4.18132e+08	1.64681e+07	1.73904e+08
Ala-Val-Lys	AVK	AVK	AVK	1.552	C14H28N4O4	316.21	[M+H]+	5.8046e+08	6.86411e+08	5.08624e+08	6.34993e+08	4.17717e+08	5.15393e+08
Lys-Xle-Gly	KJG	KLG	KIG	4.825	C14H28N4O4	316.21	[M+H]+	5.12464e+07	8.14675e+07	4.53659e+07	8.76833e+07	4.19207e+07	7.05298e+07
Gly-Xle-Glu	GJE	GLE	GIE	5.649	C13H23N3O6	317.157	[M+H]+	9.42913e+07	2.94319e+08	1.1275e+08	2.87162e+08	8.29006e+07	1.76859e+08
Val-Ala-Glu	VAE	VAE	VAE	3.036	C13H23N3O6	317.157	[M+H]+	1.4778e+08	6.73932e+06	1.23049e+08	7.27081e+06	1.20651e+08	6.38451e+06
Xle-Trp	JW	LW	IW	12.486	C17H23N3O3	317.172	[M+H]+	6.48731e+08	3.13446e+08	6.67871e+08	2.62794e+08	5.9987e+08	2.87262e+08
Xle-Val-Ser	JVS	LVS	IVS	5.986	C14H27N3O5	317.194	[M+H]+	1.25175e+07	4.65929e+07	8.72765e+06	5.21531e+07	1.18637e+08	3.85608e+07
Ser-Val-Xle	SVJ	SVL	SVI	9.26	C14H27N3O5	317.194	[M+H]+	381614	9.46392e+07	357310	7.25165e+07	9.59571e+06	1.04321e+08
Val-Ser-Xle	VSJ	VSL	VSI	10.205	C14H27N3O5	317.194	[M+H]+	4.59257e+07	1.39198e+08	5.36544e+07	1.35152e+08	3.97272e+07	1.44957e+08
Val-Xle-Ser	VJS	VLS	VIS	5.879	C14H27N3O5	317.194	[M+H]+	1.61406e+08	1.93491e+07	1.82122e+08	1.87152e+07	1.18637e+08	1.67955e+07
Ser-Val-Xle	SVJ	SVL	SVI	9.617	C14H27N3O5	317.194	[M+H]+	7.53433e+07	3.65695e+07	7.81307e+07	3.26744e+07	4.71844e+07	2.23759e+07
Xle-Ser-Val	JSV	LSV	ISV	9.766	C14H27N3O5	317.194	[M+H]+	2.60776e+08	5.24278e+06	2.51558e+08	7.24114e+06	2.39563e+08	4.55072e+06
Val-Thr-Val	VTV	VTV	VTV	8.129	C14H27N3O5	317.194	[M+H]+	1.32808e+08	1.71369e+06	1.15396e+08	2.58118e+06	1.29889e+08	1.70274e+06
Ser-Val-Asn	SVN	SVN	SVN	1.209	C12H22N4O6	318.152	[M+H]+	1.10022e+08	9.3567e+06	1.25702e+08	1.34016e+07	1.11328e+08	6.33777e+06
Thr-Ala-Lys	TAK	TAK	TAK	0.845	C13H26N4O5	318.189	[M+H]+	1.27253e+08	1.37873e+08	1.30867e+08	1.40755e+08	7.95223e+07	8.80329e+07
Gly-Xle-Met	GJM	GLM	GIM	9.389	C13H25N3O4S	319.155	[M+H]+	8.14352e+08	6.13572e+07	6.94141e+08	5.81459e+07	7.35425e+08	5.73101e+07
Thr-Xle-Ser	TJS	TLS	TIS	3.844	C13H25N3O6	319.173	[M+H]+	3.3593e+08	1.02295e+08	3.89794e+08	9.7007e+07	3.52082e+08	8.73409e+07
Thr-Ser-Xle	TSJ	TSL	TSI	7.192	C13H25N3O6	319.173	[M+H]+	2.65604e+07	9.48468e+06	2.68109e+07	8.39853e+06	1.80517e+07	1.48441e+07
Phe-Arg	FR	FR	FR	5.553	C15H23N5O3	321.179	[M+H]+	2.7924e+07	1.25232e+08	275446	1.23981e+08	3.64962e+07	2.77372e+08
Arg-Phe	RF	RF	RF	7.182	C15H23N5O3	321.179	[M+H]+	1.23867e+09	8.2294e+06	1.13801e+09	7.4205e+06	1.15962e+09	6.52554e+06
Ser-Ala-Phe	SAF	SAF	SAF	8.196	C15H21N3O5	323.147	[M+H]+	4.38358e+08	1.09025e+07	6.48041e+08	2.2882e+07	5.23169e+08	823274
Ala-Pro-His	APH	APH	APH	1.594	C14H21N5O4	323.158	[M+H]+	1.22218e+08	4.61546e+07	9.05311e+07	4.41368e+07	1.10245e+08	5.05495e+07
Gly-Ser-Tyr	GSY	GSY	GSY	4.474	C14H19N3O6	325.126	[M+H]+	3.70856e+07	4.43023e+07	4.39037e+07	2.55712e+07	3.2839e+07	1.54153e+08
Phe-Tyr	FY	FY	FY	9.295	C18H20N2O4	328.141	[M+H]+	2.81403e+08	8.26754e+07	3.10899e+08	7.76651e+07	2.76575e+08	6.99198e+07
Gly-Pro-Arg	GPR	GPR	GPR	1.405	C13H24N6O4	328.184	[M+H]+	8.57912e+06	1.04631e+08	1.03494e+07	8.66215e+07	7.1274e+06	1.01466e+08
Xle-Ala-Lys	JAK	LAK	IAK	4.043	C15H30N4O4	330.225	[M+H]+	2.27319e+07	9.04369e+07	2.88638e+07	1.24987e+08	1.19645e+07	5.48098e+07
Val-Val-Asp	VVD	VVD	VVD	4.317	C14H25N3O6	331.173	[M+H]+	4.87776e+07	2.5697e+08	4.26914e+07	2.41755e+08	4.13903e+07	2.52253e+08
Gly-Gln-Lys	GQK	GQK	GQK	0.778	C13H25N5O5	331.184	[M+H]+	1.08213e+08	2.87215e+07	1.16329e+08	4.33679e+07	6.90443e+07	1.65555e+07
Xle-Ser-Xle	JSJ	LSL	ISI	12.056	C15H29N3O5	331.209	[M+H]+	4.94422e+07	1.41326e+08	4.54577e+07	1.19262e+08	4.00281e+07	1.65231e+08
Ser-Xle-Xle	SJJ	SLL	SII	12.268	C15H29N3O5	331.209	[M+H]+	1.83302e+08	1.26044e+08	1.83959e+08	9.66696e+07	1.56454e+08	1.29066e+08
Xle-Ser-Xle	JSJ	LSL	ISI	12.476	C15H29N3O5	331.209	[M+H]+	3.29284e+07	9.40799e+07	2.84177e+07	9.21761e+07	2.6345e+07	8.24724e+07
Gly-Gln-Glu	GQE	GQE	GQE	0.918	C12H20N4O7	332.132	[M+H]+	7.57757e+07	4.1617e+06	6.42867e+07	3.7201e+06	6.16542e+07	3.13844e+06
Trp-Gln	WQ	WQ	WQ	6.225	C16H20N4O4	332.147	[M+H]+	8.59312e+07	2.11378e+06	5.94969e+07	4.05689e+06	8.14058e+07	1.57381e+06
Gln-Val-Ser	QVS	QVS	QVS	1.502	C13H24N4O6	332.168	[M+H]+	2.455e+08	2.38075e+07	2.41981e+08	2.04237e+07	1.96988e+08	2.03989e+07
Asn-Xle-Ser	NJS	NLS	NIS	5.769	C13H24N4O6	332.168	[M+H]+	2.75442e+08	1.51712e+07	2.94249e+08	1.72383e+07	2.45461e+08	1.403e+07
Asn-Val-Thr	NVT	NVT	NVT	3.057	C13H24N4O6	332.168	[M+H]+	4.55037e+07	8.59228e+07	6.13201e+07	5.16157e+07	4.21592e+07	6.65916e+07
Lys-Val-Ser	KVS	KVS	KVS	1.399	C14H28N4O5	332.204	[M+H]+	4.5877e+07	9.20141e+07	4.00896e+07	9.29354e+07	2.87384e+07	9.19172e+07
Ala-Xle-Met	AJM	ALM	AIM	9.329	C14H27N3O4S	333.171	[M+H]+	6.74813e+08	2.44074e+08	6.35874e+08	2.50842e+08	5.78142e+08	1.97229e+08
Val-Ala-Phe	VAF	VAF	VAF	11.095	C17H25N3O4	335.183	[M+H]+	4.24553e+08	4.75216e+07	3.94777e+08	3.53962e+07	5.1574e+08	4.14537e+07
Arg-Tyr	RY	RY	RY	4.691	C15H23N5O4	337.173	[M+H]+	6.42532e+07	5.44139e+06	7.70084e+07	1.26366e+07	5.77913e+07	125640
Tyr-Arg	YR	YR	YR	3.204	C15H23N5O4	337.173	[M+H]+	3.83851e+07	1.02234e+08	1.9526e+06	9.97702e+07	2.39232e+07	1.92296e+08
Ser-Pro-His	SPH	SPH	SPH	1.195	C14H21N5O5	339.153	[M+H]+	1.25738e+08	1.95701e+07	8.98497e+07	1.76163e+07	9.91708e+07	1.88487e+07
His-Trp	HW	HW	HW	8.069	C17H19N5O3	341.147	[M+H]+	7.88488e+07	4.03343e+06	7.82198e+07	190246	8.17464e+07	573488
Xle-Pro-Xle	JPJ	LPL	IPI	12.679	C17H31N3O4	341.23	[M+H]+	9.27011e+06	4.0203e+08	6.84311e+06	3.9413e+08	8.19612e+06	6.24225e+08
Xle-Pro-Asn	JPN	LPN	IPN	6.228	C15H26N4O5	342.189	[M+H]+	4.90027e+06	4.07137e+08	3.61154e+06	3.58629e+08	7.323e+06	3.4082e+08
Val-Pro-Gln	VPQ	VPQ	VPQ	4.397	C15H26N4O5	342.189	[M+H]+	2.07463e+06	1.51028e+08	1.81909e+07	1.19874e+08	3.76362e+07	2.10462e+08
Ala-Val-Pro-Gly	AVPG	AVPG	AVPG	5.022	C15H26N4O5	342.189	[M+H]+	8.72155e+06	7.54404e+08	5.41557e+06	6.82096e+08	1.53638e+07	5.0291e+08
Val-Ala-Pro-Gly	VAPG	VAPG	VAPG	5.453	C15H26N4O5	342.189	[M+H]+	5.63729e+07	1.06701e+07	4.26333e+07	1.45413e+07	1.10028e+08	1.08094e+07
Val-Xle-Xle	VJJ	VLL	VII	13.062	C17H33N3O4	343.245	[M+H]+	1.02059e+08	3.7898e+07	1.14956e+08	3.46608e+07	8.68603e+07	3.3058e+07
Xle-Val-Xle	JVJ	LVL	IVI	13.468	C17H33N3O4	343.245	[M+H]+	2.82777e+09	2.2716e+08	2.73436e+09	2.39998e+08	2.53346e+09	3.16669e+06
Xle-Val-Xle	JVJ	LVL	IVI	12.886	C17H33N3O4	343.245	[M+H]+	1.27459e+08	1.22852e+08	1.10082e+08	1.20899e+08	6.64861e+07	6.00416e+07
Val-Val-Gln	VVQ	VVQ	VVQ	3.514	C15H28N4O5	344.204	[M+H]+	9.36945e+08	1.8304e+08	9.90163e+08	1.7377e+08	8.6399e+08	1.42931e+08
Xle-Val-Asn	JVN	LVN	IVN	4.557	C15H28N4O5	344.204	[M+H]+	3.0096e+08	3.75476e+07	3.30246e+08	3.79895e+07	2.58991e+08	3.16286e+07
Gln-Val-Val	QVV	QVV	QVV	6.843	C15H28N4O5	344.204	[M+H]+	1.77728e+08	172630	1.72193e+08	2.45019e+07	1.77283e+08	179382
Ala-Val-Arg	AVR	AVR	AVR	2.477	C14H28N6O4	344.216	[M+H]+	6.12902e+08	8.16761e+08	5.71095e+08	7.48075e+08	5.14219e+08	8.38921e+08
Arg-Val-Ala	RVA	RVA	RVA	3.738	C14H28N6O4	344.216	[M+H]+	3.37399e+08	5.2304e+07	3.26341e+08	5.52447e+07	3.53806e+08	4.47144e+07
Gly-Arg-Xle	GRJ	GRL	GRI	6.584	C14H28N6O4	344.216	[M+H]+	6.23986e+08	2.2529e+06	5.87843e+08	1.8502e+06	5.8417e+08	2.34963e+06
Gly-Arg-Xle	GRJ	GRL	GRI	6.911	C14H28N6O4	344.216	[M+H]+	5.30763e+08	523093	6.24336e+08	773569	5.74176e+08	675220
Val-Val-Lys	VVK	VVK	VVK	3.412	C16H32N4O4	344.241	[M+H]+	1.0918e+08	2.6742e+08	1.4172e+08	2.99482e+08	7.35123e+07	2.27932e+08
Gln-Ala-Gln	QAQ	QAQ	QAQ	0.838	C13H23N5O6	345.163	[M+H]+	5.77694e+07	3.06987e+06	4.80926e+07	6.53298e+06	5.54882e+07	3.73885e+06
Xle-Val-Asp	JVD	LVD	IVD	6.105	C15H27N3O6	345.188	[M+H]+	5.68629e+07	2.98042e+08	3.40177e+07	2.9833e+08	2.80684e+07	2.60649e+08
Asp-Val-Xle	DVJ	DVL	DVI	9.845	C15H27N3O6	345.188	[M+H]+	6.93095e+07	7.21238e+07	8.28126e+07	8.31611e+07	4.93627e+07	6.05069e+07
Xle-Thr-Xle	JTJ	LTL	ITI	12.177	C16H31N3O5	345.225	[M+H]+	2.33666e+07	6.92618e+08	1.48646e+07	5.83117e+08	2.06604e+07	6.61519e+08
Xle-Ser-Gln	JSQ	LSQ	ISQ	3.874	C14H26N4O6	346.184	[M+H]+	2.44593e+08	7.66491e+07	2.33801e+08	8.66009e+07	2.08891e+08	7.20874e+07
Gln-Xle-Ser	QJS	QLS	QIS	4.044	C14H26N4O6	346.184	[M+H]+	4.48008e+08	5.32182e+06	4.14487e+08	1.47676e+07	3.88836e+08	5.63054e+06
Lys-Ala-Glu	KAE	KAE	KAE	0.906	C14H26N4O6	346.184	[M+H]+	1.5231e+08	1.63389e+07	1.92487e+08	2.25102e+07	9.33059e+07	9.36162e+06
Lys-Xle-Ser	KJS	KLS	KIS	3.303	C15H30N4O5	346.22	[M+H]+	1.30208e+08	2.05543e+07	1.71906e+08	2.75338e+07	5.26607e+07	1.37863e+07
Ser-Xle-Glu	SJE	SLE	SIE	5.5	C14H25N3O7	347.168	[M+H]+	1.0797e+08	5.2843e+07	8.86224e+07	5.49585e+07	1.04651e+08	4.785e+07
Ala-Met-Lys	AMK	AMK	AMK	2.232	C14H28N4O4S	348.181	[M+H]+	6.31165e+07	3.17603e+08	7.35178e+07	3.10599e+08	6.75305e+07	2.82929e+08
Lys-Thr-Thr	KTT	KTT	KTT	0.905	C14H28N4O6	348.199	[M+H]+	1.57315e+08	4.91417e+07	1.20437e+08	4.67403e+07	1.21268e+08	4.40922e+07
Xle-Ala-Phe	JAF	LAF	IAF	13.29	C18H27N3O4	349.198	[M+H]+	8.6661e+07	456669	1.07683e+08	286398	4.44789e+07	188363
Xle-Ala-Phe	JAF	LAF	IAF	12.875	C18H27N3O4	349.198	[M+H]+	2.31527e+08	4.98822e+07	3.37387e+08	5.22109e+07	2.86598e+08	4.36898e+07
Phe-Xle-Ala	FJA	FLA	FIA	10.789	C18H27N3O4	349.198	[M+H]+	3.57275e+09	6.85019e+07	3.56072e+09	8.90923e+07	3.20812e+09	5.38951e+07
Gln-Gly-Phe	QGF	QGF	QGF	7.976	C16H22N4O5	350.157	[M+H]+	1.26534e+08	1.44956e+06	1.10266e+08	1.98391e+06	1.16625e+08	1.43885e+06
Lys-Gly-Phe	KGF	KGF	KGF	7.148	C17H26N4O4	350.194	[M+H]+	1.17803e+08	145233	1.26459e+08	140616	762029	116592
Asp-Met-Ser	DMS	DMS	DMS	2.006	C12H21N3O7S	351.108	[M+H]+	6.46954e+07	5.61707e+06	7.06058e+07	5.87076e+06	5.52267e+07	5.70936e+06
Gly-Phe-Glu	GFE	GFE	GFE	6.936	C16H21N3O6	351.141	[M+H]+	1.23576e+08	2.92761e+06	1.23014e+08	7.73966e+06	1.31435e+08	3.05269e+06
Ser-Val-Phe	SVF	SVF	SVF	11.039	C17H25N3O5	351.178	[M+H]+	5.1408e+08	5.12418e+07	1.20834e+08	1.42254e+07	5.29004e+07	8.17355e+06
Val-Ala-Pro-Ala	VAPA	VAPA	VAPA	5.978	C16H28N4O5	356.204	[M+H]+	8.20148e+07	5.76153e+06	8.59095e+07	7.87756e+06	2.14371e+07	2.2062e+06
Gly-Gln-Gly-Pro	GQGP	GQGP	GQGP	2.992	C14H23N5O6	357.163	[M+H]+	5.28792e+07	8.05441e+06	1.09902e+08	6.75438e+06	6.79928e+07	4.88196e+06
Xle-Pro-Glu	JPE	LPE	IPE	7.468	C16H27N3O6	357.188	[M+H]+	3.67693e+08	9.06009e+07	2.59105e+08	7.86171e+07	2.94889e+08	6.99977e+07
Xle-Xle-Xle	JJJ	LLL	III	15.216	C18H35N3O4	357.261	[M+H]+	6.5227e+08	1.62983e+08	5.64755e+08	1.6483e+08	6.4903e+08	2.00254e+08
Gly-Xle-Xle-Gly	GJJG	GLLG	GIIG	10.89	C16H30N4O5	358.22	[M+H]+	960343	6.87793e+07	659150	5.04765e+07	999556	7.9483e+07
Gln-Val-Xle	QVJ	QVL	QVI	9.186	C16H30N4O5	358.22	[M+H]+	1.70623e+09	1.18662e+07	1.76784e+09	8.80872e+06	1.44071e+09	1.05052e+07
Val-Xle-Gln	VJQ	VLQ	VIQ	5.884	C16H30N4O5	358.22	[M+H]+	6.77162e+07	5.81495e+07	7.39801e+07	4.4935e+07	7.95659e+07	4.98788e+07
Xle-Val-Gln	JVQ	LVQ	IVQ	5.311	C16H30N4O5	358.22	[M+H]+	2.03368e+08	4.49446e+08	1.82519e+08	4.28886e+08	2.0228e+08	4.02893e+08
Xle-Xle-Asn	JJN	LLN	IIN	7.097	C16H30N4O5	358.22	[M+H]+	5.84408e+07	2.15547e+08	6.48895e+07	2.21132e+08	5.55666e+07	2.31682e+08
Arg-Xle-Ala	RJA	RLA	RIA	6.286	C15H30N6O4	358.231	[M+H]+	4.76493e+07	2.91615e+08	4.86572e+07	2.36792e+08	2.93963e+07	2.62803e+08
Val-Xle-Lys	VJK	VLK	VIK	5.575	C17H34N4O4	358.256	[M+H]+	8.54882e+06	1.13033e+08	9.97933e+06	1.39868e+08	7.24958e+06	104344
Lys-Val-Xle	KVJ	KVL	KVI	8.664	C17H34N4O4	358.256	[M+H]+	3.68836e+08	4.97911e+07	5.53852e+08	6.28596e+07	2.24033e+08	2.55205e+07
Asn-Val-Gln	NVQ	NVQ	NVQ	1.637	C14H25N5O6	359.179	[M+H]+	2.80603e+08	1.06784e+07	2.79179e+08	1.31462e+07	2.57258e+08	1.03815e+07
Met-Pro-Xle	MPJ	MPL	MPI	11.451	C16H29N3O4S	359.186	[M+H]+	1.61228e+07	2.32834e+08	1.31074e+07	1.96538e+08	1.21193e+07	2.50571e+08
Xle-Val-Glu	JVE	LVE	IVE	6.468	C16H29N3O6	359.204	[M+H]+	4.31727e+08	2.85317e+07	5.18588e+08	3.88878e+07	2.62864e+08	1.72022e+07
Xle-Xle-Asp	JJD	LLD	IID	8.686	C16H29N3O6	359.204	[M+H]+	2.36625e+07	1.11754e+08	1.94744e+07	7.59647e+07	6.39865e+06	7.24102e+07
Arg-Ala-Asp	RAD	RAD	RAD	0.975	C13H24N6O6	360.174	[M+H]+	1.16479e+08	3.42547e+07	1.11303e+08	3.41957e+07	1.05308e+08	3.16813e+07
Val-Asp-Glu	VDE	VDE	VDE	2.927	C14H23N3O8	361.147	[M+H]+	7.10411e+07	771671	5.418e+07	1.07786e+06	7.30753e+07	794250
Xle-Ser-Phe	JSF	LSF	ISF	13.105	C18H27N3O5	365.193	[M+H]+	6.71759e+07	6.57229e+08	5.91198e+07	6.87796e+08	5.73247e+07	6.75683e+08
Ser-Phe-Xle	SFJ	SFL	SFI	13.33	C18H27N3O5	365.193	[M+H]+	1.74659e+09	1.06987e+08	2.06313e+09	1.15393e+08	1.52581e+09	9.09827e+07
Val-Thr-Phe	VTF	VTF	VTF	11.223	C18H27N3O5	365.193	[M+H]+	8.6393e+07	5.9324e+06	8.25505e+07	5.32552e+06	6.55072e+07	4.47248e+06
Xle-Ala-Tyr	JAY	LAY	IAY	9.708	C18H27N3O5	365.193	[M+H]+	3.71635e+08	4.51979e+07	3.94088e+08	4.95373e+07	3.25341e+08	4.12164e+07
Xle-Phe-Ser	JFS	LFS	IFS	10.032	C18H27N3O5	365.193	[M+H]+	1.37082e+07	1.32221e+08	1.42762e+07	1.25597e+08	1.03589e+07	1.17173e+08
Tyr-Xle-Ala	YJA	YLA	YIA	8.376	C18H27N3O5	365.193	[M+H]+	6.93585e+08	2.13585e+07	7.49584e+08	3.30524e+07	6.54063e+08	1.94677e+07
Xle-Pro-His	JPH	LPH	IPH	7.168	C17H27N5O4	365.205	[M+H]+	7.54536e+07	1.20505e+08	1.56653e+08	1.26843e+08	6.06627e+07	1.26061e+08
Trp-Tyr	WY	WY	WY	10.828	C20H21N3O4	367.151	[M+H]+	1.24691e+08	1.17049e+06	1.05026e+08	2.07046e+06	1.27562e+08	1.34557e+06
Ala-Xle-Pro-Ala	AJPA	ALPA	AIPA	8.296	C17H30N4O5	370.22	[M+H]+	1.55485e+09	1.48278e+08	1.63102e+09	1.70332e+08	1.47638e+09	1.43492e+08
Ala-Xle-Pro-Ala	AJPA	ALPA	AIPA	7.855	C17H30N4O5	370.22	[M+H]+	5.88747e+08	7.47149e+06	7.49685e+08	4.14763e+07	4.64183e+08	1.05429e+07
Gln-Pro-Gln	QPQ	QPQ	QPQ	1.33	C15H25N5O6	371.179	[M+H]+	5.04514e+07	1.20188e+06	3.25638e+07	1.87039e+06	4.33696e+07	593248
Val-Val-Val-Gly	VVVG	VVVG	VVVG	6.38	C17H32N4O5	372.235	[M+H]+	2.45486e+07	2.01172e+08	1.6792e+07	1.19936e+08	3.06231e+07	1.96454e+08
Gln-Xle-Xle	QJJ	QLL	QII	11.87	C17H32N4O5	372.235	[M+H]+	5.43345e+08	1.78716e+07	5.16306e+08	2.41561e+07	5.2606e+08	1.90713e+07
Xle-Gln-Xle	JQJ	LQL	IQI	12.374	C17H32N4O5	372.236	[M+H]+	1.31386e+08	1.26973e+08	1.17236e+08	1.18959e+08	1.1688e+08	1.13042e+08
Arg-Val-Val	RVV	RVV	RVV	6.919	C16H32N6O4	372.247	[M+H]+	328324	6.7382e+07	323246	9.17601e+07	9.13219e+06	5.38339e+07
Lys-Xle-Asn	KJN	KLN	KIN	2.561	C16H31N5O5	373.231	[M+H]+	5.41463e+08	2.15233e+08	6.02407e+08	2.15118e+08	3.45547e+08	1.51421e+08
Asn-Xle-Glu	NJE	NLE	NIE	5.127	C15H26N4O7	374.178	[M+H]+	5.54104e+06	1.59029e+07	3.26064e+06	2.05866e+07	5.92366e+08	1.58541e+07
Trp-Val-Ala	WVA	WVA	WVA	10.271	C19H26N4O4	374.194	[M+H]+	4.48701e+07	1.87945e+08	2.74419e+07	1.64255e+08	5.57179e+07	2.21039e+08
Val-Ala-Val-Ser	VAVS	VAVS	VAVS	5.982	C16H30N4O6	374.215	[M+H]+	2.14684e+08	2.14677e+07	2.41743e+08	2.00556e+07	2.06718e+08	2.31533e+07
Arg-Ser-Xle	RSJ	RSL	RSI	6.835	C15H30N6O5	374.226	[M+H]+	1.90724e+07	3.38566e+08	1.38664e+07	3.40717e+08	6.59344e+07	3.89353e+08
Phe-Val-Xle	FVJ	FVL	FVI	15.08	C20H31N3O4	377.23	[M+H]+	9.52549e+07	2.37633e+08	1.04616e+08	1.94812e+08	1.00731e+08	2.38944e+08
Xle-Val-Phe	JVF	LVF	IVF	14.617	C20H31N3O4	377.23	[M+H]+	5.14199e+07	9.40777e+07	5.22152e+07	8.9201e+07	4.81849e+07	7.70698e+07
Phe-Val-Asn	FVN	FVN	FVN	6.661	C18H26N4O5	378.189	[M+H]+	3.83271e+06	7.37923e+07	1.24802e+07	8.58371e+07	5.13201e+06	7.0726e+07
Gly-Arg-Phe	GRF	GRF	GRF	8.067	C17H26N6O4	378.2	[M+H]+	2.34665e+08	2.27858e+06	2.88582e+08	4.652e+06	2.29974e+08	2.30477e+06
Thr-Xle-Phe	TJF	TLF	TIF	13.52	C19H29N3O5	379.209	[M+H]+	1.00266e+08	5.74915e+06	1.1403e+08	6.49836e+06	9.93032e+07	4.66922e+06
Tyr-Xle-Ser	YJS	YLS	YIS	6.697	C18H27N3O6	381.188	[M+H]+	1.04283e+07	8.41305e+07	1.0221e+07	9.31758e+07	1.01183e+07	6.69785e+07
Ser-Met-Phe	SMF	SMF	SMF	11.981	C17H25N3O5S	383.15	[M+H]+	8.00401e+07	1.53906e+07	8.80295e+07	2.45974e+07	4.31714e+07	2.23212e+07
Xle-Pro-Val-Gly	JPVG	LPVG	IPVG	9.742	C18H32N4O5	384.235	[M+H]+	455432	1.02466e+08	371019	8.12035e+07	777957	9.22298e+07
Val-Val-Pro-Ala	VVPA	VVPA	VVPA	6.998	C18H32N4O5	384.235	[M+H]+	4.9824e+08	7.70368e+06	5.04905e+08	1.18774e+07	4.84611e+08	9.11334e+06
Val-Xle-Pro-Gly	VJPG	VLPG	VIPG	8.059	C18H32N4O5	384.235	[M+H]+	8.56029e+07	9.91414e+07	9.69314e+07	7.88349e+07	1.16648e+08	8.89747e+07
Asn-Pro-Arg	NPR	NPR	NPR	1.451	C15H27N7O5	385.205	[M+H]+	1.70773e+08	1.40831e+08	1.4634e+08	1.19797e+08	1.60521e+08	1.0945e+08
Xle-Val-Arg	JVR	LVR	IVR	5.907	C17H34N6O4	386.262	[M+H]+	5.29996e+08	2.55881e+08	5.80119e+08	2.54282e+08	5.10902e+08	2.50295e+08
Gln-Xle-Gln	QJQ	QLQ	QIQ	4.425	C16H29N5O6	387.21	[M+H]+	6.89782e+07	853757	6.15174e+07	1.86663e+06	7.65263e+07	823285
Lys-Gly-Ala-Xle	KGAJ	KGAL	KGAI	6.606	C17H33N5O5	387.246	[M+H]+	1.0605e+08	331216	1.27105e+08	383059	9.04709e+07	352824
Glu-Gln-Xle	EQJ	EQL	EQI	7.166	C16H28N4O7	388.194	[M+H]+	1.29089e+08	1.08642e+07	1.07632e+08	1.653e+07	1.10553e+08	9.9671e+06
Trp-Xle-Ala	WJA	WLA	WIA	11.81	C20H28N4O4	388.209	[M+H]+	1.54948e+08	5.28578e+07	1.02168e+08	3.76192e+07	1.44543e+08	5.9327e+07
Val-Ala-Xle-Ser	VAJS	VALS	VAIS	6.605	C17H32N4O6	388.23	[M+H]+	3.30868e+07	9.8294e+07	2.91588e+07	9.03163e+07	3.36128e+07	7.26022e+07
Lys-Xle-Glu	KJE	KLE	KIE	5.21	C17H32N4O6	388.23	[M+H]+	5.8315e+07	174572	7.62426e+07	135603	3.00136e+07	131522
Val-Ser-Xle-Ala	VSJA	VSLA	VSIA	8.867	C17H32N4O6	388.23	[M+H]+	1.28451e+07	9.46822e+07	1.36771e+07	7.52579e+07	8.72618e+06	9.63927e+07
Asn-Gln-Glu	NQE	NQE	NQE	0.903	C14H23N5O8	389.153	[M+H]+	1.01752e+08	2.28015e+06	7.16011e+07	3.08969e+06	6.49122e+07	1.49042e+06
Ser-Gly-Asn-Xle	SGNJ	SGNL	SGNI	5.558	C15H27N5O7	389.189	[M+H]+	3.21637e+08	3.58797e+06	2.14892e+08	6.73527e+06	3.3865e+08	3.7919e+06
Phe-Pro-Ala-Gly	FPAG	FPAG	FPAG	8.789	C19H26N4O5	390.188	[M+H]+	2.65959e+06	8.68999e+08	1.48797e+06	8.23225e+08	4.29322e+06	1.28978e+09
Xle-Val-Tyr	JVY	LVY	IVY	10.774	C20H31N3O5	393.224	[M+H]+	5.47689e+08	9.09183e+08	4.44427e+08	9.30352e+08	4.7704e+08	8.19125e+08
Xle-Val-Tyr	JVY	LVY	IVY	10.147	C20H31N3O5	393.225	[M+H]+	1.6861e+08	4.97009e+07	1.08435e+08	4.44443e+07	1.59297e+08	5.65256e+07
Met-Asp-Met	MDM	MDM	MDM	8.583	C14H25N3O6S2	395.117	[M+H]+	1.20339e+08	2.8964e+06	1.51082e+08	4.49453e+06	1.75114e+08	3.04773e+06
Thr-Phe-Glu	TFE	TFE	TFE	7.007	C18H25N3O7	395.167	[M+H]+	3.99629e+08	5.50598e+07	3.25087e+08	5.75506e+07	3.53791e+08	5.20132e+07
Thr-Tyr-Xle	TYJ	TYL	TYI	10.592	C19H29N3O6	395.204	[M+H]+	1.78937e+08	1.07439e+07	1.72904e+08	1.34838e+07	1.48949e+08	9.69282e+06
Thr-Xle-Tyr	TJY	TLY	TIY	9.02	C19H29N3O6	395.204	[M+H]+	1.69232e+08	1.17959e+07	1.24255e+08	1.16085e+07	1.507e+08	1.17337e+07
Ser-Tyr-Gln	SYQ	SYQ	SYQ	3.445	C17H24N4O7	396.163	[M+H]+	1.50277e+07	1.78683e+08	1.57019e+07	1.46742e+08	1.57146e+07	1.61916e+08
His-Xle-Glu	HJE	HLE	HIE	5.31	C17H27N5O6	397.194	[M+H]+	9.76217e+07	1.61038e+07	7.95118e+07	1.28238e+07	1.63889e+08	1.7307e+07
Ala-Tyr-Phe	AYF	AYF	AYF	11.956	C21H25N3O5	399.178	[M+H]+	1.01225e+07	7.43521e+07	9.22338e+06	7.21543e+07	1.21639e+07	1.001e+08
Gly-Xle-Xle-Val	GJJV	GLLV	GIIV	14.022	C19H36N4O5	400.267	[M+H]+	1.30541e+08	3.80712e+06	1.545e+08	5.431e+06	1.1438e+08	3.64891e+06
Val-Ala-Val-Xle	VAVJ	VAVL	VAVI	12.132	C19H36N4O5	400.267	[M+H]+	3.21077e+07	1.2534e+08	3.29442e+07	1.00544e+08	3.76498e+07	1.48644e+08
Xle-Arg-Xle	JRJ	LRL	IRI	10.748	C18H36N6O4	400.278	[M+H]+	2.78359e+08	6.33964e+07	2.21971e+08	4.87762e+07	2.8849e+08	7.90973e+07
Gly-Gln-Val-Val	GQVV	GQVV	GQVV	7.265	C17H31N5O6	401.226	[M+H]+	3.85423e+08	3.7511e+06	3.87808e+08	7.57869e+06	3.6338e+08	3.19209e+06
Asn-Xle-Arg	NJR	NLR	NIR	4.75	C16H31N7O5	401.237	[M+H]+	2.35967e+08	2.68242e+07	2.15564e+08	2.77696e+07	2.54233e+08	2.70217e+07
Ser-Ser-Pro-Xle	SSPJ	SSPL	SSPI	8.396	C17H30N4O7	402.21	[M+H]+	4.15294e+08	2.04809e+07	3.80424e+08	2.57243e+07	4.04708e+08	1.57098e+07
Gly-Asp-Val-Xle	GDVJ	GDVL	GDVI	9.907	C17H30N4O7	402.21	[M+H]+	1.82488e+08	5.38633e+06	1.67636e+08	9.85978e+06	4.4269e+08	3.67234e+06
Xle-Gly-Thr-Xle	JGTJ	LGTL	IGTI	12.918	C18H34N4O6	402.246	[M+H]+	7.73071e+08	2.63097e+07	8.25836e+08	3.07898e+07	7.19024e+08	2.91262e+07
Lys-Gln-Glu	KQE	KQE	KQE	0.89	C16H29N5O7	403.205	[M+H]+	8.91346e+07	3.31362e+07	8.09483e+07	3.94816e+07	6.62036e+07	3.35285e+07
Xle-Ser-Gly-Gln	JSGQ	LSGQ	ISGQ	4.308	C16H29N5O7	403.205	[M+H]+	1.16755e+08	6.8539e+06	4.35728e+06	8.10082e+06	2.06017e+06	4.82625e+06
Trp-Xle-Ser	WJS	WLS	WIS	10.515	C20H28N4O5	404.204	[M+H]+	1.29721e+08	5.32999e+06	1.07348e+08	5.20909e+06	1.37851e+08	5.691e+06
Ala-Phe-Pro-Ala	AFPA	AFPA	AFPA	9.963	C20H28N4O5	404.204	[M+H]+	1.72753e+08	4.77228e+06	1.79324e+08	8.19054e+06	2.55589e+08	8.10726e+06
Lys-Met-Gln	KMQ	KMQ	KMQ	2.217	C16H31N5O5S	405.203	[M+H]+	3.06459e+06	1.77575e+08	2.6761e+06	1.67614e+08	3.60498e+06	1.44733e+08
Gln-Xle-Phe	QJF	QLF	QIF	13.069	C20H30N4O5	406.22	[M+H]+	1.36443e+08	1.6394e+07	1.40207e+08	1.38586e+07	1.90049e+08	1.34149e+07
Phe-Xle-Gln	FJQ	FLQ	FIQ	9.421	C20H30N4O5	406.22	[M+H]+	2.98427e+07	1.94863e+08	2.66132e+07	1.43526e+08	2.89796e+07	1.68814e+08
Xle-Phe-Gln	JFQ	LFQ	IFQ	10.485	C20H30N4O5	406.22	[M+H]+	2.59244e+07	6.90375e+07	3.02104e+07	4.74241e+07	3.00451e+07	3.47491e+07
Lys-Phe-Asn	KFN	KFN	KFN	4.915	C19H29N5O5	407.215	[M+H]+	3.34597e+08	134166	3.41555e+08	138620	2.64492e+08	172900
Xle-Xle-Tyr	JJY	LLY	IIY	12.091	C21H33N3O5	407.24	[M+H]+	1.06395e+08	1.3851e+08	1.10033e+08	1.21028e+08	1.05343e+08	1.31497e+08
Ala-Tyr-Arg	AYR	AYR	AYR	4.419	C18H28N6O5	408.21	[M+H]+	8.3486e+06	2.80404e+08	8.168e+06	2.07575e+08	1.01029e+07	3.0914e+08
Ser-Arg-Phe	SRF	SRF	SRF	7.926	C18H28N6O5	408.21	[M+H]+	2.49889e+08	2.9186e+06	2.20667e+08	4.52961e+06	2.37446e+08	2.81001e+06
Ser-Phe-Arg	SFR	SFR	SFR	6.401	C18H28N6O5	408.21	[M+H]+	2.66062e+08	4.27475e+08	2.44588e+08	3.63335e+08	2.38082e+08	4.39524e+08
Asp-Xle-Tyr	DJY	DLY	DIY	9.162	C19H27N3O7	409.183	[M+H]+	1.60052e+08	2.87994e+06	1.55599e+08	3.67177e+06	1.65551e+08	2.60459e+06
Val-Val-Gly-His	VVGH	VVGH	VVGH	4.311	C18H30N6O5	410.226	[M+H]+	2.03643e+08	1.85551e+06	1.60158e+08	2.66097e+06	2.07655e+08	1.93887e+06
Thr-Tyr-Glu	TYE	TYE	TYE	4.841	C18H25N3O8	411.162	[M+H]+	7.42464e+07	2.77513e+07	6.33017e+07	2.63607e+07	7.80754e+07	2.32902e+07
His-Gly-Ser-Xle	HGSJ	HGSL	HGSI	6.464	C17H28N6O6	412.205	[M+H]+	2.05367e+08	8.14904e+07	1.38447e+08	8.19137e+07	2.27133e+08	1.09304e+08
Xle-Asn-Pro-Ala	JNPA	LNPA	INPA	7.795	C18H31N5O6	413.226	[M+H]+	8.53238e+07	6.62286e+06	6.86278e+07	5.7744e+06	7.93853e+07	5.16106e+06
Xle-Xle-Gly-Xle	JJGJ	LLGL	IIGI	13.949	C20H38N4O5	414.282	[M+H]+	1.45768e+06	1.83548e+08	499190	2.17982e+08	2.25253e+06	1.8089e+08
Ser-Phe-Tyr	SFY	SFY	SFY	10.814	C21H25N3O6	415.172	[M+H]+	8.32805e+07	2.38616e+08	8.1661e+07	1.91617e+08	8.11531e+07	2.31114e+08
Arg-Gly-Pro-Ser	RGPS	RGPS	RGPS	2.228	C16H29N7O6	415.216	[M+H]+	1.68935e+08	2.20054e+07	1.67496e+08	2.18122e+07	1.47677e+08	2.18694e+07
Gly-Val-Xle-Gln	GVJQ	GVLQ	GVIQ	8.363	C18H33N5O6	415.241	[M+H]+	3.29921e+08	2.6127e+08	1.61952e+08	1.41667e+08	3.24027e+08	2.52194e+08
Arg-Xle-Gln	RJQ	RLQ	RIQ	4.829	C17H33N7O5	415.252	[M+H]+	1.33936e+08	3.15018e+07	1.11197e+08	3.51408e+07	1.90049e+08	3.41142e+07
Gln-Arg-Xle	QRJ	QRL	QRI	6.909	C17H33N7O5	415.252	[M+H]+	1.28561e+09	3.6026e+06	1.26631e+09	5.13765e+06	1.0728e+09	4.1253e+06
Ala-Val-Val-Lys	AVVK	AVVK	AVVK	5.748	C19H37N5O5	415.277	[M+H]+	3.96763e+08	7.99047e+07	5.37681e+08	8.28686e+07	3.32795e+08	5.73728e+07
Val-Asp-Xle-Ala	VDJA	VDLA	VDIA	9.099	C18H32N4O7	416.225	[M+H]+	8.25848e+06	1.11854e+08	6.14492e+06	9.41761e+07	2.16597e+06	9.20854e+07
Asp-Xle-Val-Ala	DJVA	DLVA	DIVA	9.481	C18H32N4O7	416.225	[M+H]+	4.50254e+06	2.16126e+08	4.26814e+06	1.93856e+08	7.32535e+06	1.88365e+08
Xle-Glu-Arg	JER	LER	IER	4.908	C17H32N6O6	416.236	[M+H]+	180818	7.67123e+07	7.26049e+06	8.18451e+07	136410	7.7238e+07
Arg-Xle-Glu	RJE	RLE	RIE	5.366	C17H32N6O6	416.236	[M+H]+	7.33979e+07	2.94248e+07	1.0246e+08	3.4428e+07	7.31883e+07	154581
Arg-Gly-Gly-Glu	RGGE	RGGE	RGGE	1.101	C15H27N7O7	417.195	[M+H]+	8.62265e+07	3.49653e+06	8.72987e+07	4.67304e+06	1.12513e+08	3.01113e+06
Ala-Thr-Xle-Asn	ATJN	ATLN	ATIN	5.217	C17H31N5O7	417.22	[M+H]+	2.65667e+08	1.60451e+07	2.51626e+08	1.86796e+07	2.43008e+08	1.40222e+07
Xle-Asp-Thr-Ala	JDTA	LDTA	IDTA	5.767	C17H30N4O8	418.204	[M+H]+	3.01102e+08	2.11815e+07	2.93908e+08	2.32433e+07	2.78152e+08	2.08856e+07
Thr-Val-Ser-Xle	TVSJ	TVSL	TVSI	10.84	C18H34N4O7	418.241	[M+H]+	322907	5.8671e+07	343844	4.85175e+07	437235	7.56461e+07
Ala-Ala-Phe-Xle	AAFJ	AAFL	AAFI	13.896	C21H32N4O5	420.235	[M+H]+	8.5878e+06	1.59085e+08	9.1919e+06	1.23696e+08	4.38845e+06	1.60668e+08
Gln-Gln-Phe	QQF	QQF	QQF	7.702	C19H27N5O6	421.194	[M+H]+	9.76608e+07	8.88793e+06	1.39151e+08	1.30605e+06	6.85867e+07	8.81542e+06
Lys-Gly-Phe-Ala	KGFA	KGFA	KGFA	7.751	C20H31N5O5	421.23	[M+H]+	1.12394e+08	6.95515e+07	1.14832e+08	1.80577e+08	5.25047e+07	1.5169e+08
Trp-Ser-Met	WSM	WSM	WSM	12.588	C19H26N4O5S	422.161	[M+H]+	6.46636e+07	8.08315e+07	5.276e+07	7.05657e+07	5.78521e+07	7.87856e+07
Gln-Phe-Glu	QFE	QFE	QFE	6.788	C19H26N4O7	422.178	[M+H]+	1.22898e+08	1.40524e+06	1.14324e+08	2.58099e+06	9.77635e+07	1.39253e+06
Glu-Phe-Gln	EFQ	EFQ	EFQ	6.209	C19H26N4O7	422.178	[M+H]+	2.00826e+08	4.24184e+07	2.36894e+08	3.42695e+07	1.85157e+08	3.53624e+07
Xle-Ala-Gly-Tyr	JAGY	LAGY	IAGY	9.231	C20H30N4O6	422.215	[M+H]+	1.97208e+08	6.62587e+07	2.26513e+08	6.32363e+07	1.58503e+08	6.24698e+07
Tyr-Xle-Gln	YJQ	YLQ	YIQ	7.178	C20H30N4O6	422.215	[M+H]+	6.74321e+06	1.11599e+08	6.85888e+06	9.57165e+07	6.89823e+06	1.10977e+08
Arg-Phe-Thr	RFT	RFT	RFT	7.231	C19H30N6O5	422.226	[M+H]+	6.42037e+06	3.1669e+08	5.70774e+06	2.83867e+08	6.78117e+06	3.07401e+08
Asn-Gln-Tyr	NQY	NQY	NQY	4.898	C18H25N5O7	423.173	[M+H]+	8.67346e+07	1.01366e+06	9.83808e+07	1.89056e+06	1.01418e+08	1.13004e+06
Gly-Val-Xle-His	GVJH	GVLH	GVIH	7.751	C19H32N6O5	424.241	[M+H]+	1.377e+08	1.08174e+08	1.34597e+08	1.56767e+08	7.41021e+07	1.00173e+08
Phe-Phe-Xle	FFJ	FFL	FFI	17.602	C24H31N3O4	425.229	[M+H]+	2.686e+07	2.0309e+08	2.10795e+07	1.67376e+08	2.90755e+07	2.33114e+08
Gly-Gly-Phe-Phe	GGFF	GGFF	GGFF	14.366	C22H26N4O5	426.188	[M+H]+	4.68289e+07	3.32309e+08	4.48049e+07	2.40428e+08	4.70593e+07	2.95654e+08
His-Ala-Val-Thr	HAVT	HAVT	HAVT	4.385	C18H30N6O6	426.221	[M+H]+	623191	1.25695e+08	318683	1.0332e+08	803794	2.12167e+08
Xle-Ala-Pro-Gln	JAPQ	LAPQ	IAPQ	8.225	C19H33N5O6	427.241	[M+H]+	8.07169e+06	5.12642e+08	4.36733e+06	5.70454e+08	1.25938e+07	5.04162e+08
Val-Val-Pro-Asn	VVPN	VVPN	VVPN	6.051	C19H33N5O6	427.241	[M+H]+	3.21895e+08	6.76672e+06	2.59253e+08	8.97598e+06	3.61076e+08	7.63026e+06
Xle-Pro-Ala-Glu	JPAE	LPAE	IPAE	7.194	C19H32N4O7	428.225	[M+H]+	3.33421e+06	2.47428e+08	2.53749e+06	2.13022e+08	4.71611e+06	2.43851e+08
Xle-Pro-Ser-Xle	JPSJ	LPSL	IPSI	12.79	C20H36N4O6	428.261	[M+H]+	3.4659e+07	6.83674e+08	2.77629e+07	6.21102e+08	3.78015e+07	6.63354e+08
Xle-Ser-Pro-Xle	JSPJ	LSPL	ISPI	11.667	C20H36N4O6	428.262	[M+H]+	1.34687e+09	4.57581e+07	1.29518e+09	4.44054e+07	1.41965e+09	3.37621e+07
Xle-Xle-Pro-Ser	JJPS	LLPS	IIPS	9.953	C20H36N4O6	428.262	[M+H]+	8.21501e+08	7.4766e+07	7.34655e+08	8.01882e+07	9.92099e+08	7.54096e+07
Phe-Tyr-Thr	FYT	FYT	FYT	9.612	C22H27N3O6	429.188	[M+H]+	2.53778e+07	3.59968e+08	1.97003e+07	2.9601e+08	2.63184e+07	3.54775e+08
Xle-Ser-Pro-Asn	JSPN	LSPN	ISPN	5.344	C18H31N5O7	429.22	[M+H]+	1.3174e+08	1.20773e+08	1.42688e+08	1.01508e+08	1.46394e+08	9.52651e+07
Ser-Xle-Pro-Asn	SJPN	SLPN	SIPN	7.043	C18H31N5O7	429.22	[M+H]+	8.10231e+07	6.31398e+07	6.48791e+07	7.39295e+07	8.02039e+07	6.90859e+07
Ala-Asn-Xle-Xle	ANJJ	ANLL	ANII	10.641	C19H35N5O6	429.257	[M+H]+	1.81781e+07	1.51967e+08	1.90109e+07	1.95573e+08	1.41399e+07	1.39794e+08
Ala-Gln-Val-Xle	AQVJ	AQVL	AQVI	9.753	C19H35N5O6	429.257	[M+H]+	1.24192e+09	1.24226e+08	1.50546e+09	1.50793e+08	8.9745e+08	9.93693e+07
Lys-Gly-Xle-Xle	KGJJ	KGLL	KGII	11.983	C20H39N5O5	429.293	[M+H]+	884757	1.00666e+08	367702	8.81891e+07	1.07595e+06	9.22354e+07
His-Phe-Gln	HFQ	HFQ	HFQ	6.088	C20H26N6O5	430.194	[M+H]+	1.68108e+08	3.60591e+08	2.15659e+08	7.80926e+07	7.74137e+07	4.40931e+08
Asn-Val-Ala-Gln	NVAQ	NVAQ	NVAQ	2.923	C17H30N6O7	430.216	[M+H]+	2.9187e+07	4.04423e+08	3.40427e+07	3.5882e+08	2.9393e+07	4.0387e+08
Val-Xle-Ala-Glu	VJAE	VLAE	VIAE	7.661	C19H34N4O7	430.241	[M+H]+	1.47558e+08	3.69294e+08	1.54263e+08	4.33789e+08	1.16624e+08	3.29683e+08
Asp-Xle-Xle-Ala	DJJA	DLLA	DIIA	9.676	C19H34N4O7	430.241	[M+H]+	3.38479e+08	4.05203e+06	2.32835e+08	5.78002e+06	3.55054e+08	4.15601e+06
Ser-Xle-Val-Xle	SJVJ	SLVL	SIVI	14.333	C20H38N4O6	430.277	[M+H]+	4.95572e+07	7.7641e+07	5.11585e+07	7.47781e+07	4.63258e+07	5.92856e+07
Glu-Asn-Xle-Gly	ENJG	ENLG	ENIG	6.1	C17H29N5O8	431.2	[M+H]+	3.66999e+06	4.47771e+08	1.60885e+06	4.13894e+08	1.28061e+07	4.36125e+08
Arg-Gln-Glu	RQE	RQE	RQE	1.171	C16H29N7O7	431.211	[M+H]+	1.69834e+08	2.35426e+07	1.34279e+08	1.90619e+07	1.35393e+08	2.01919e+07
Gly-Arg-Xle-Ser	GRJS	GRLS	GRIS	5.44	C17H33N7O6	431.247	[M+H]+	1.17815e+08	2.83535e+08	1.05517e+08	2.37898e+08	1.17358e+08	3.03101e+08
Trp-Pro-Met	WPM	WPM	WPM	13.834	C21H28N4O4S	432.181	[M+H]+	995753	1.09772e+08	609607	9.64101e+07	627624	1.20594e+08
Trp-Val-Glu	WVE	WVE	WVE	9.595	C21H28N4O6	432.199	[M+H]+	5.08689e+08	1.51543e+07	4.46016e+08	1.55551e+07	4.37941e+08	1.31971e+07
Xle-Ser-Ser-Gln	JSSQ	LSSQ	ISSQ	6.023	C17H31N5O8	433.215	[M+H]+	1.05773e+07	3.94535e+08	6.61852e+06	4.11588e+08	9.91694e+06	4.60522e+08
Ser-Gln-Ser-Xle	SQSJ	SQSL	SQSI	6.738	C17H31N5O8	433.215	[M+H]+	1.47484e+08	5.49056e+06	1.30737e+08	1.00294e+07	1.26447e+08	4.68478e+06
Pro-Phe-Gly-Asp	PFGD	PFGD	PFGD	9.625	C20H26N4O7	434.178	[M+H]+	2.2836e+08	1.57566e+07	3.38285e+08	1.82377e+07	2.15299e+08	6.08073e+06
Phe-Ala-Val-Val	FAVV	FAVV	FAVV	13.303	C22H34N4O5	434.251	[M+H]+	1.85709e+08	5.78127e+07	2.07759e+08	6.32052e+07	1.80213e+08	6.00984e+07
Phe-Xle-Arg	FJR	FLR	FIR	9.288	C21H34N6O4	434.262	[M+H]+	1.14125e+08	4.28313e+07	5.67903e+07	3.3845e+07	1.0584e+08	4.82681e+07
Arg-Phe-Asn	RFN	RFN	RFN	5.719	C19H29N7O5	435.221	[M+H]+	9.97788e+07	5.0067e+07	1.02659e+08	3.80627e+07	1.05313e+08	5.71642e+07
Phe-Asn-Arg	FNR	FNR	FNR	6.377	C19H29N7O5	435.221	[M+H]+	3.50217e+07	3.61537e+08	2.22766e+07	3.37678e+08	3.52303e+07	3.55051e+08
Glu-Ala-Ala-Phe	EAAF	EAAF	EAAF	9.226	C20H28N4O7	436.194	[M+H]+	9.00342e+08	4.47696e+07	8.86621e+08	4.78607e+07	7.47656e+08	3.16397e+07
Arg-Phe-Asp	RFD	RFD	RFD	6.777	C19H28N6O6	436.205	[M+H]+	3.28221e+06	1.11415e+08	2.93748e+06	1.24269e+08	3.49207e+06	1.12449e+08
Xle-Ser-Ala-Phe	JSAF	LSAF	ISAF	12.354	C21H32N4O6	436.23	[M+H]+	3.0101e+07	6.14361e+07	2.91229e+07	9.40338e+07	1.07482e+07	6.04469e+07
Ala-Asn-Ala-Tyr	ANAY	ANAY	ANAY	5.802	C19H27N5O7	437.189	[M+H]+	9.96398e+07	4.62245e+06	1.07269e+08	4.85543e+06	7.34062e+07	1.92939e+06
Lys-Gln-Tyr	KQY	KQY	KQY	4.693	C20H31N5O6	437.225	[M+H]+	1.02977e+08	234419	1.05113e+08	370217	3.65484e+07	193729
Phe-Thr-Thr-Ala	FTTA	FTTA	FTTA	7.453	C20H30N4O7	438.209	[M+H]+	1.64861e+06	8.7645e+07	1.93077e+06	8.31109e+07	1.58437e+06	9.4101e+07
Lys-Tyr-Met	KYM	KYM	KYM	7.698	C20H32N4O5S	440.207	[M+H]+	9.30604e+07	1.63491e+07	1.0204e+08	1.87677e+07	6.71766e+07	1.73411e+07
Xle-Phe-Tyr	JFY	LFY	IFY	12.865	C24H31N3O5	441.224	[M+H]+	8.73689e+08	9.57831e+07	8.73986e+08	8.37993e+07	8.32181e+08	1.06581e+08
Phe-Tyr-Xle	FYJ	FYL	FYI	15.491	C24H31N3O5	441.224	[M+H]+	1.70316e+07	1.265e+08	1.40143e+07	1.14027e+08	1.31815e+07	1.17461e+08
Val-Val-Pro-Gln	VVPQ	VVPQ	VVPQ	6.307	C20H35N5O6	441.257	[M+H]+	1.2289e+09	4.68653e+07	1.36547e+09	4.55965e+07	1.2108e+09	3.7351e+07
Ala-Gln-Pro-Gln	AQPQ	AQPQ	AQPQ	1.703	C18H30N6O7	442.215	[M+H]+	2.04781e+07	8.5681e+06	2.38261e+06	1.88409e+06	4.42794e+07	1.55643e+07
Gln-Thr-Xle-Pro	QTJP	QTLP	QTIP	13.661	C21H38N4O6	442.277	[M+H]+	4.92264e+06	3.86168e+06	4.8053e+06	2.97636e+06	9.23934e+07	7.38998e+06
Xle-Pro-Ser-Gln	JPSQ	LPSQ	IPSQ	7.696	C19H33N5O7	443.236	[M+H]+	1.50323e+06	4.19393e+08	219047	3.70483e+08	3.2919e+06	4.04947e+08
Ser-Pro-Xle-Lys	SPJK	SPLK	SPIK	6.589	C20H37N5O6	443.272	[M+H]+	2.88565e+06	2.30008e+08	2.256e+06	2.46045e+08	2.61415e+06	2.06052e+08
Xle-Val-Val-Asn	JVVN	LVVN	IVVN	8.03	C20H37N5O6	443.272	[M+H]+	1.95763e+08	3.58936e+08	1.63693e+08	3.92892e+08	1.56355e+08	2.74942e+08
Ala-Xle-Xle-Lys	AJJK	ALLK	AIIK	9.244	C21H41N5O5	443.309	[M+H]+	3.60459e+06	1.47276e+08	2.38616e+06	1.60365e+08	3.02449e+06	1.67505e+08
Glu-Xle-Xle-Ala	EJJA	ELLA	EIIA	11.633	C20H36N4O7	444.256	[M+H]+	1.43643e+08	6.55322e+07	1.77809e+08	5.38155e+07	1.2239e+08	6.73344e+07
Val-Xle-Val-Asp	VJVD	VLVD	VIVD	9.129	C20H36N4O7	444.256	[M+H]+	6.85138e+07	7.38704e+07	8.14196e+07	5.28142e+07	1.16799e+08	1.21972e+08
Val-Val-Val-Glu	VVVE	VVVE	VVVE	7.992	C20H36N4O7	444.256	[M+H]+	4.05096e+06	1.52911e+08	3.97361e+06	1.02958e+08	1.90733e+06	1.38493e+08
Xle-Trp-Gln	JWQ	LWQ	IWQ	10.392	C22H31N5O5	445.23	[M+H]+	2.08194e+08	2.31745e+07	2.07314e+08	2.57403e+07	1.87889e+08	2.11855e+07
Val-Xle-Thr-Asn	VJTN	VLTN	VITN	6.168	C19H35N5O7	445.252	[M+H]+	1.59301e+07	1.11909e+08	1.60486e+07	8.11737e+07	1.55624e+07	1.00403e+08
Ala-Val-Arg-Thr	AVRT	AVRT	AVRT	4.962	C18H35N7O6	445.263	[M+H]+	8.27499e+07	596701	8.86984e+07	357429	8.44147e+07	164802
Asn-Gly-Ala-Gln	NGAQ	NGAQ	NGAQ	0.888	C16H26N6O9	446.174	[M+H]+	3.80136e+07	2.11883e+07	1.01901e+08	2.16213e+07	1.07486e+08	1.78097e+07
Xle-Gly-Glu-Glu	JGEE	LGEE	IGEE	6.824	C18H30N4O9	446.199	[M+H]+	1.47867e+09	2.18482e+07	1.82992e+09	5.60136e+07	7.95016e+08	1.72828e+07
Ala-Asn-Xle-Met	ANJM	ANLM	ANIM	9.591	C18H33N5O6S	447.213	[M+H]+	1.57492e+07	6.0147e+08	9.22575e+06	5.5352e+08	1.55037e+07	7.27677e+08
Ala-Met-Xle-Asn	AMJN	AMLN	AMIN	8.043	C18H33N5O6S	447.213	[M+H]+	6.76455e+07	1.91172e+07	1.11892e+08	1.21023e+07	8.57072e+07	9.57542e+06
Thr-Ser-Xle-Gln	TSJQ	TSLQ	TSIQ	5.472	C18H33N5O8	447.231	[M+H]+	2.50975e+08	1.10063e+08	2.80287e+08	1.5462e+08	2.17519e+08	9.82528e+07
Gly-Xle-Tyr-Pro	GJYP	GLYP	GIYP	11.514	C22H32N4O6	448.23	[M+H]+	4.68999e+06	3.61978e+06	1.11382e+08	723240	2.36274e+06	2.2748e+06
Asp-Asn-Ala-Met	DNAM	DNAM	DNAM	4.605	C16H27N5O8S	449.156	[M+H]+	1.39527e+08	1.21225e+07	1.30899e+08	1.10897e+07	1.76243e+08	1.3662e+07
Ser-Ser-Gln-Glu	SSQE	SSQE	SSQE	0.938	C16H27N5O10	449.174	[M+H]+	6.88951e+07	1.16852e+07	9.17015e+07	9.97748e+06	1.17024e+08	7.82615e+06
Asn-Gly-Xle-Phe	NGJF	NGLF	NGIF	13.673	C21H31N5O6	449.225	[M+H]+	2.00291e+06	3.32731e+08	528128	3.491e+08	3.07221e+06	2.73301e+08
Gln-Phe-Arg	QFR	QFR	QFR	11.528	C20H31N7O5	449.237	[M+H]+	1.20049e+08	5.1878e+06	1.3805e+08	6.6556e+06	1.28929e+08	4.77706e+06
Phe-Gln-Arg	FQR	FQR	FQR	6.391	C20H31N7O5	449.237	[M+H]+	6.94377e+07	8.16029e+06	5.80421e+07	4.91523e+06	7.99942e+07	7.31984e+06
Ala-Gly-Arg-Phe	AGRF	AGRF	AGRF	8.066	C20H31N7O5	449.237	[M+H]+	4.80261e+08	5.49059e+06	5.21914e+08	1.05035e+07	4.08445e+08	5.02553e+06
Gly-Phe-Val-Lys	GFVK	GFVK	GFVK	8.794	C22H35N5O5	449.262	[M+H]+	7.20098e+07	1.25009e+06	8.6471e+07	1.89857e+06	3.39296e+07	591857
Val-Glu-Phe-Gly	VEFG	VEFG	VEFG	9.916	C21H30N4O7	450.209	[M+H]+	2.51779e+07	1.53888e+08	4.19751e+07	8.30371e+07	1.24319e+07	8.38543e+07
Asp-Gly-Xle-Phe	DGJF	DGLF	DGIF	13.621	C21H30N4O7	450.209	[M+H]+	5.25266e+06	2.62075e+08	3.01728e+06	2.56847e+08	5.48335e+06	2.43336e+08
Val-Ala-Phe-Asp	VAFD	VAFD	VAFD	9.968	C21H30N4O7	450.21	[M+H]+	2.51779e+07	5.78999e+06	4.19751e+07	3.58214e+06	1.24319e+07	8.38543e+07
Arg-Phe-Glu	RFE	RFE	RFE	7.036	C20H30N6O6	450.221	[M+H]+	8.00171e+07	1.20557e+08	6.5096e+07	9.84754e+07	1.19916e+08	1.44963e+08
Gly-Val-Xle-Tyr	GVJY	GVLY	GVIY	11.804	C22H34N4O6	450.246	[M+H]+	8.0543e+08	2.7168e+08	7.09307e+08	2.32221e+08	7.34387e+08	2.522e+08
Val-Val-Pro-His	VVPH	VVPH	VVPH	6.821	C21H34N6O5	450.257	[M+H]+	3.85124e+08	8.66176e+06	3.75134e+08	1.63846e+07	3.25143e+08	1.47545e+07
Arg-Xle-Tyr	RJY	RLY	RIY	8.843	C21H34N6O5	450.257	[M+H]+	2.06812e+06	8.81338e+07	1.6918e+06	7.15383e+07	3.92901e+06	8.30583e+07
Xle-Tyr-Arg	JYR	LYR	IYR	6.761	C21H34N6O5	450.257	[M+H]+	4.72717e+06	2.91024e+07	3.75134e+08	3.20911e+07	6.17771e+06	3.88583e+07
Asn-Tyr-Arg	NYR	NYR	NYR	4.388	C19H29N7O6	451.216	[M+H]+	2.8346e+06	6.62155e+07	2.93021e+06	5.20369e+07	2.59823e+06	8.84257e+07
Xle-Phe-Ser-Ser	JFSS	LFSS	IFSS	9.764	C21H32N4O7	452.225	[M+H]+	270063	1.33765e+08	326363	1.11008e+08	680007	3.08636e+07
Val-Thr-Pro-His	VTPH	VTPH	VTPH	4.571	C20H32N6O6	452.236	[M+H]+	2.87022e+08	3.32388e+07	1.89147e+08	3.80447e+07	2.40272e+08	2.70471e+07
His-Asn-Val-Ser	HNVS	HNVS	HNVS	2.09	C18H29N7O7	455.211	[M+H]+	8.6115e+07	3.04569e+06	8.12141e+07	2.37431e+06	7.09988e+07	1.88681e+06
Xle-Gln-Pro-Val	JQPV	LQPV	IQPV	9.426	C21H37N5O6	455.272	[M+H]+	2.76472e+08	2.90293e+06	1.82213e+08	3.65181e+06	2.85165e+08	3.15336e+06
Ala-Tyr-Phe-Gly	AYFG	AYFG	AYFG	10.633	C23H28N4O6	456.199	[M+H]+	1.4906e+07	1.27597e+08	1.46719e+07	1.02546e+08	1.8345e+07	1.43111e+08
Val-Gln-Val-Xle	VQVJ	VQVL	VQVI	11.841	C21H39N5O6	457.288	[M+H]+	8.36391e+07	5.89489e+08	7.40847e+07	4.30146e+08	1.10595e+08	5.33174e+08
Val-Val-Xle-Gln	VVJQ	VVLQ	VVIQ	9.081	C21H39N5O6	457.288	[M+H]+	1.8229e+08	2.52431e+08	1.80477e+08	2.67684e+08	1.79053e+08	2.27398e+08
Val-Val-Xle-Lys	VVJK	VVLK	VVIK	8.467	C22H43N5O5	457.324	[M+H]+	3.57269e+08	5.1869e+07	3.39e+08	2.59179e+07	3.41654e+08	2.68639e+07
Xle-Pro-Val-Met	JPVM	LPVM	IPVM	13.119	C21H38N4O5S	458.254	[M+H]+	1.14557e+06	1.65709e+08	613701	2.01055e+08	1.75597e+06	1.73976e+08
Xle-Val-Xle-Asp	JVJD	LVLD	IVID	11.139	C21H38N4O7	458.272	[M+H]+	5.9453e+07	4.27067e+07	1.22815e+08	3.57122e+07	1.54415e+07	6.95974e+06
Ser-Gln-Pro-Glu	SQPE	SQPE	SQPE	2.445	C18H29N5O9	459.194	[M+H]+	1.37154e+08	1.22707e+06	9.46623e+07	1.83864e+06	1.22355e+08	1.09067e+06
Ala-Glu-Gln-Xle	AEQJ	AEQL	AEQI	7.717	C19H33N5O8	459.231	[M+H]+	1.36331e+08	2.34227e+06	1.85473e+08	4.55332e+06	1.17244e+08	2.06003e+06
Val-Asn-Asp-Xle	VNDJ	VNDL	VNDI	8.313	C19H33N5O8	459.231	[M+H]+	1.44973e+08	1.59092e+06	1.18097e+08	2.50247e+06	1.11089e+08	1.52467e+06
Xle-Xle-Gln-Ser	JJQS	LLQS	IIQS	10.051	C20H37N5O7	459.267	[M+H]+	1.11309e+08	5.16924e+08	1.1884e+08	5.5424e+08	9.36416e+07	4.80896e+08
Arg-Xle-Ala-Thr	RJAT	RLAT	RIAT	6.894	C19H37N7O6	459.278	[M+H]+	453937	1.88312e+08	469684	2.17651e+08	815745	2.22908e+08
Arg-Xle-Ala-Thr	RJAT	RLAT	RIAT	7.605	C19H37N7O6	459.279	[M+H]+	5.44608e+07	1.16496e+08	5.63581e+07	1.10373e+08	4.37529e+07	1.31744e+08
Asn-Val-Thr-Glu	NVTE	NVTE	NVTE	4.972	C18H31N5O9	461.21	[M+H]+	1.99045e+08	3.3297e+06	1.97561e+08	9.8095e+06	2.37741e+08	3.81104e+06
Lys-Ala-Xle-Met	KAJM	KALM	KAIM	9.157	C20H39N5O5S	461.265	[M+H]+	8.04155e+06	7.64333e+07	6.07049e+06	8.85463e+07	4.24441e+06	3.80428e+07
Tyr-Pro-Xle-Ala	YPJA	YPLA	YPIA	10.902	C23H34N4O6	462.247	[M+H]+	734552	2.05508e+08	2.3305e+06	9.05672e+07	2.14534e+06	1.72103e+08
Met-Asn-Thr-Val	MNTV	MNTV	MNTV	8.623	C18H33N5O7S	463.208	[M+H]+	5.57955e+07	1.98942e+06	7.64769e+07	3.36935e+06	6.6008e+07	1.27819e+06
Ser-Asn-Xle-Met	SNJM	SNLM	SNIM	9.503	C18H33N5O7S	463.208	[M+H]+	8.3702e+06	2.11141e+08	1.22419e+07	1.63397e+08	1.27826e+07	2.04729e+08
Ala-Phe-Val-Gln	AFVQ	AFVQ	AFVQ	9.664	C22H33N5O6	463.241	[M+H]+	1.70608e+06	1.02177e+08	1.14063e+06	1.05869e+08	1.90137e+06	9.44228e+07
Ser-Phe-Val-Xle	SFVJ	SFVL	SFVI	15.544	C23H36N4O6	464.262	[M+H]+	5.52493e+08	1.70891e+08	5.78319e+08	1.55165e+08	5.45668e+08	6.40469e+07
Ser-Xle-Val-Phe	SJVF	SLVF	SIVF	14.912	C23H36N4O6	464.262	[M+H]+	4.53938e+06	2.22412e+08	3.26691e+06	3.44493e+07	4.74674e+06	2.21083e+07
Ala-Asp-Val-Tyr	ADVY	ADVY	ADVY	8.019	C21H30N4O8	466.204	[M+H]+	1.7885e+08	3.60523e+08	2.19539e+08	3.20843e+08	1.64977e+08	3.18248e+08
Ser-Thr-Xle-Phe	STJF	STLF	STIF	13.555	C22H34N4O7	466.241	[M+H]+	1.94721e+09	4.44272e+07	2.06634e+09	6.33755e+07	1.73834e+09	4.32934e+07
Asn-Xle-Xle-Asn	NJJN	NLLN	NIIN	9.124	C20H36N6O7	472.263	[M+H]+	4.27005e+08	9.18633e+07	4.15022e+08	8.78649e+07	4.51929e+08	1.07083e+08
Ser-Val-Xle-Arg	SVJR	SVLR	SVIR	7.713	C20H39N7O6	473.294	[M+H]+	2.06112e+08	6.67385e+08	2.12079e+08	5.86054e+08	1.84153e+08	6.7827e+08
Val-Asp-Xle-Glu	VDJE	VDLE	VDIE	9.018	C20H34N4O9	474.231	[M+H]+	2.70968e+08	3.39671e+07	1.98159e+08	2.49507e+07	2.18341e+08	2.09262e+07
Thr-Asn-Xle-Glu	TNJE	TNLE	TNIE	6.12	C19H33N5O9	475.226	[M+H]+	4.74001e+08	6.22642e+07	4.89363e+08	5.891e+07	4.99026e+08	5.98547e+07
Lys-Glu-Thr-Val	KETV	KETV	KETV	10.989	C20H37N5O8	475.262	[M+H]+	6.66012e+07	2.27793e+06	5.84754e+07	2.30725e+06	8.72689e+07	3.11758e+06
Ala-Gln-Phe-Xle	AQFJ	AQFL	AQFI	13.244	C23H35N5O6	477.257	[M+H]+	6.79658e+07	5.59395e+06	7.26995e+07	5.11045e+06	4.42449e+08	2.61057e+07
Phe-Asn-Val-Val	FNVV	FNVV	FNVV	12.839	C23H35N5O6	477.257	[M+H]+	1.95566e+06	2.24882e+08	1.14549e+06	2.20641e+08	2.86872e+06	1.84179e+08
Xle-Pro-Ser-Tyr	JPSY	LPSY	IPSY	10.844	C23H34N4O7	478.241	[M+H]+	2.15991e+06	2.30608e+08	1.08281e+06	1.93067e+08	2.64118e+06	2.15992e+08
Xle-Pro-Tyr-Ser	JPYS	LPYS	IPYS	9.642	C23H34N4O7	478.241	[M+H]+	615144	6.99274e+07	421672	7.31123e+07	929624	3.78819e+07
Tyr-Xle-Ser-Pro	YJSP	YLSP	YISP	9.055	C23H34N4O7	478.241	[M+H]+	1.12541e+08	2.55906e+07	1.62844e+08	3.85515e+07	5.18391e+07	1.61964e+07
Xle-Xle-Ser-Phe	JJSF	LLSF	IISF	14.159	C24H38N4O6	478.277	[M+H]+	752688	1.1169e+08	958843	1.25629e+08	1.67307e+06	1.02779e+08
Ala-Glu-Phe-Asn	AEFN	AEFN	AEFN	6.945	C21H29N5O8	479.2	[M+H]+	389122	8.04782e+07	1.20538e+06	5.69265e+07	1.5645e+06	8.23368e+07
Gly-Gln-Xle-Tyr	GQJY	GQLY	GQIY	9.787	C22H33N5O7	479.236	[M+H]+	8.29703e+07	1.15459e+06	1.23599e+08	2.45642e+06	1.17804e+08	1.79402e+06
Tyr-Ala-Val-Lys	YAVK	YAVK	YAVK	7.099	C23H37N5O6	479.272	[M+H]+	7.24594e+06	7.8424e+07	5.25757e+06	9.29162e+07	4.90871e+06	7.84177e+07
Ala-Asp-Xle-Tyr	ADJY	ADLY	ADIY	9.483	C22H32N4O8	480.22	[M+H]+	9.17238e+08	3.40673e+07	8.8714e+08	3.5492e+07	8.51669e+08	3.50689e+07
Thr-Thr-Pro-Tyr	TTPY	TTPY	TTPY	7.575	C22H32N4O8	480.22	[M+H]+	1.52976e+08	1.74203e+06	1.5578e+08	2.65222e+06	1.62019e+08	1.95193e+06
Ser-Val-Xle-Tyr	SVJY	SVLY	SVIY	11.087	C23H36N4O7	480.256	[M+H]+	6.08527e+08	5.51349e+07	4.13323e+08	5.7117e+07	6.03109e+08	6.6478e+07
Asp-Met-Met-Ser	DMMS	DMMS	DMMS	7.13	C17H30N4O8S2	482.148	[M+H]+	1.15994e+08	4.10707e+06	1.18503e+08	4.4558e+06	9.17402e+07	4.74946e+06
Ser-Glu-Thr-Phe	SETF	SETF	SETF	8.885	C21H30N4O9	482.199	[M+H]+	3.5514e+08	2.76895e+06	3.58244e+08	7.28867e+06	3.31778e+08	2.95962e+06
Thr-Ser-Asn-Tyr	TSNY	TSNY	TSNY	5.384	C20H29N5O9	483.194	[M+H]+	8.68377e+07	2.0822e+06	9.92478e+07	3.59178e+06	9.06898e+07	2.07939e+06
Glu-Xle-Xle-Xle	EJJJ	ELLL	EIII	16.068	C23H42N4O7	486.303	[M+H]+	3.21907e+08	8.04989e+06	3.51357e+08	8.92254e+06	3.43101e+08	6.88756e+06
Lys-Xle-Asn-Xle	KJNJ	KLNL	KINI	11.665	C22H42N6O6	486.314	[M+H]+	9.83352e+07	1.55317e+08	1.06894e+08	1.58749e+08	8.38568e+07	1.25862e+08
Xle-Val-Lys-Gln	JVKQ	LVKQ	IVKQ	5.204	C22H42N6O6	486.314	[M+H]+	8.85582e+07	3.74346e+07	8.5522e+07	4.11246e+07	6.14474e+07	3.42446e+07
Met-Pro-Xle-Gln	MPJQ	MPLQ	MPIQ	9.686	C21H37N5O6S	487.244	[M+H]+	1.41188e+07	8.38947e+07	1.22114e+07	5.70641e+07	9.66824e+06	7.88145e+07
Ser-Gln-Glu-Gln	SQEQ	SQEQ	SQEQ	1.108	C18H30N6O10	490.2	[M+H]+	1.40888e+08	3.67736e+06	1.48552e+08	6.42313e+06	1.14429e+08	3.93486e+06
Asn-Xle-Val-Phe	NJVF	NLVF	NIVF	15.319	C24H37N5O6	491.272	[M+H]+	1.32029e+06	6.92948e+07	945521	4.47144e+07	1.06609e+06	7.94428e+07
Thr-Xle-Xle-Phe	TJJF	TLLF	TIIF	16.675	C25H40N4O6	492.293	[M+H]+	1.1545e+09	1.61933e+08	1.19564e+09	1.41567e+08	8.74735e+08	1.40898e+08
Asp-Asn-Val-Phe	DNVF	DNVF	DNVF	10.982	C22H31N5O8	493.215	[M+H]+	1.56409e+08	1.13506e+07	1.35167e+08	6.4605e+06	1.69602e+08	3.304e+06
Ser-Phe-Xle-Gln	SFJQ	SFLQ	SFIQ	11.641	C23H35N5O7	493.251	[M+H]+	2.23169e+07	2.22831e+08	2.32692e+07	2.11065e+08	2.52112e+07	1.99642e+08
Tyr-Val-Gly-Arg	YVGR	YVGR	YVGR	6.82	C22H35N7O6	493.263	[M+H]+	6.07596e+06	7.42144e+07	4.91254e+06	7.85181e+07	4.95534e+06	8.12144e+07
Phe-Asn-Thr-Asn	FNTN	FNTN	FNTN	5.863	C21H30N6O8	494.21	[M+H]+	1.91093e+08	7.23993e+06	1.75544e+08	8.33348e+06	1.59022e+08	6.60778e+06
Thr-Xle-Val-Tyr	TJVY	TLVY	TIVY	11.178	C24H38N4O7	494.272	[M+H]+	1.36226e+09	6.72593e+07	1.34084e+09	5.76556e+07	1.16274e+09	6.67675e+07
Ser-Arg-Ser-Phe	SRSF	SRSF	SRSF	7.976	C21H33N7O7	495.242	[M+H]+	1.04946e+08	2.41698e+06	9.80665e+07	3.18805e+06	7.70659e+07	2.73812e+06
Phe-Phe-Xle-Ala	FFJA	FFLA	FFIA	16.521	C27H36N4O5	496.267	[M+H]+	1.75131e+07	1.07212e+08	1.84174e+07	9.95292e+07	1.5753e+07	1.27463e+08
His-Met-Val-Asn	HMVN	HMVN	HMVN	5.878	C20H33N7O6S	499.219	[M+H]+	233092	8.01735e+07	247227	7.27529e+07	224078	6.88443e+07
Asp-Xle-Arg-Pro	DJRP	DLRP	DIRP	7.541	C21H37N7O7	499.273	[M+H]+	785202	4.74194e+08	416548	5.68382e+07	657616	7.78843e+07
Val-Arg-Val-Gln	VRVQ	VRVQ	VRVQ	6.021	C21H40N8O6	500.305	[M+H]+	1.26946e+07	7.72162e+07	1.28695e+07	1.05197e+08	9.70588e+06	7.65402e+07
Glu-Xle-Xle-Glu	EJJE	ELLE	EIIE	11.082	C22H39N5O8	501.278	[M+H]+	1.47262e+06	8.80154e+07	1.22765e+07	9.47177e+07	1.46319e+06	9.70698e+07
Xle-Asp-Gln-Lys	JDQK	LDQK	IDQK	3.151	C21H38N6O8	502.273	[M+H]+	9.55228e+07	982687	1.02646e+08	1.67205e+06	6.90609e+06	81316.2
Gln-Arg-Xle-Ser	QRJS	QRLS	QRIS	5.819	C20H38N8O7	502.284	[M+H]+	5.74499e+07	483870	8.2857e+07	610543	2.99548e+06	81117.8
Met-Asn-Gln-Xle	MNQJ	MNQL	MNQI	9.095	C20H36N6O7S	504.234	[M+H]+	6.25603e+08	1.73748e+07	6.18301e+08	2.10203e+07	6.21727e+08	2.07053e+07
Met-Asn-Gln-Xle	MNQJ	MNQL	MNQI	9.148	C20H36N6O7S	504.235	[M+H]+	5.41995e+06	1.67507e+07	6.18301e+08	1.40321e+07	6.21727e+08	2.07053e+07
Ser-Arg-Asp-Glu	SRDE	SRDE	SRDE	1.387	C18H31N7O10	505.211	[M+H]+	2.07448e+08	2.98682e+06	1.6359e+08	4.63082e+06	1.55009e+08	2.63986e+06
Xle-Pro-Asn-Tyr	JPNY	LPNY	IPNY	10.619	C24H35N5O7	505.252	[M+H]+	2.80008e+06	4.17902e+08	300762	3.73673e+08	3.97518e+06	4.26787e+08
Phe-Asn-Val-Lys	FNVK	FNVK	FNVK	9.056	C24H38N6O6	506.283	[M+H]+	1.75811e+06	1.34895e+08	1.00131e+06	1.21764e+08	1.79477e+06	1.52105e+08
Gly-Arg-Xle-Tyr	GRJY	GRLY	GRIY	9.121	C23H37N7O6	507.278	[M+H]+	1.73592e+07	7.76714e+07	1.29448e+07	7.74863e+07	1.37836e+07	8.44762e+07
Xle-Thr-Xle-Tyr	JTJY	LTLY	ITIY	13.769	C25H40N4O7	508.288	[M+H]+	1.65207e+08	6.69826e+06	1.96962e+08	1.11253e+07	1.47563e+08	6.00909e+06
Tyr-Gln-Ala-Glu	YQAE	YQAE	YQAE	6.148	C22H31N5O9	509.21	[M+H]+	1.93605e+08	1.25151e+07	1.86845e+08	1.43993e+07	2.11044e+08	1.20683e+07
Ser-Asn-Tyr-Gln	SNYQ	SNYQ	SNYQ	4.066	C21H30N6O9	510.205	[M+H]+	375803	8.84407e+07	251946	8.67962e+07	502666	9.06813e+07
Tyr-Ser-Asn-Lys	YSNK	YSNK	YSNK	2.038	C22H34N6O8	510.242	[M+H]+	6.6858e+07	1.06718e+06	7.39073e+07	1.32977e+06	5.02062e+07	624239
Asn-His-Xle-Glu	NHJE	NHLE	NHIE	5.581	C21H33N7O8	511.237	[M+H]+	5.47586e+08	5.77063e+07	5.07286e+08	5.23846e+07	4.58949e+08	4.98637e+07
Phe-Tyr-Xle-Ala	FYJA	FYLA	FYIA	14.22	C27H36N4O6	512.261	[M+H]+	1.6313e+07	8.23394e+07	1.3261e+07	1.04728e+08	1.33798e+07	1.23686e+08
Phe-Xle-Pro-His	FJPH	FLPH	FIPH	10.574	C26H36N6O5	512.273	[M+H]+	5.12185e+08	6.31099e+06	3.50204e+08	8.48712e+06	3.76932e+08	5.22298e+06
Asn-Pro-Gln-Arg	NPQR	NPQR	NPQR	3.33	C20H35N9O7	513.264	[M+H]+	2.72814e+07	2.29771e+08	1.39073e+07	1.89872e+08	5.76064e+07	2.1746e+08
Pro-Asn-Arg-Gln	PNRQ	PNRQ	PNRQ	3.221	C20H35N9O7	513.264	[M+H]+	2.72814e+07	2.29771e+08	3.35885e+07	1.89872e+08	5.31647e+06	5.49102e+06
Phe-Tyr-Gly-Glu	FYGE	FYGE	FYGE	10.948	C25H30N4O8	514.204	[M+H]+	1.22453e+08	1.83115e+06	9.57672e+07	1.96178e+06	1.30188e+08	1.84977e+06
Phe-Tyr-Thr-Ser	FYTS	FYTS	FYTS	8.47	C25H32N4O8	516.22	[M+H]+	3.30444e+08	4.91318e+07	3.19947e+08	3.93782e+07	1.65218e+08	2.64215e+07
Lys-Xle-Glu-Gln	KJEQ	KLEQ	KIEQ	5.629	C22H40N6O8	516.288	[M+H]+	974685	4.45479e+08	1.0351e+06	4.05123e+08	2.73711e+06	3.49434e+08
Lys-Xle-Gln-Glu	KJQE	KLQE	KIQE	5.962	C22H40N6O8	516.289	[M+H]+	7.51023e+07	893388	6.17625e+07	1.39156e+06	4.84033e+07	138269
Lys-Xle-Glu-Lys	KJEK	KLEK	KIEK	5.739	C23H44N6O7	516.325	[M+H]+	4.9032e+07	94814.3	8.05833e+07	108077	1.21756e+07	96303.8
Ser-Lys-Glu-Arg	SKER	SKER	SKER	6.853	C20H38N8O8	518.279	[M+H]+	1.4107e+08	154623	1.15014e+08	144952	1.09585e+08	196325
Ser-Arg-Glu-Glu	SREE	SREE	SREE	1.717	C19H33N7O10	519.227	[M+H]+	1.28416e+08	6.84417e+06	1.14163e+08	6.6978e+06	1.24309e+08	6.75244e+06
Asn-Glu-Pro-Tyr	NEPY	NEPY	NEPY	6.956	C23H32N6O8	520.226	[M+H]+	1.09675e+08	1.60284e+07	1.15703e+08	1.17065e+07	7.6071e+07	6.99201e+06
Phe-Glu-Xle-Asn	FEJN	FELN	FEIN	11.157	C24H35N5O8	521.246	[M+H]+	4.78494e+06	6.65535e+07	7.93161e+06	4.84752e+07	4.03669e+06	8.33446e+07
Trp-Val-Ala-Phe	WVAF	WVAF	WVAF	16.565	C28H35N5O5	521.262	[M+H]+	3.24514e+08	7.37624e+07	2.70397e+08	7.30178e+07	3.01771e+08	9.02253e+07
Phe-Gln-Gln-Thr	FQQT	FQQT	FQQT	5.901	C23H34N6O8	522.242	[M+H]+	1.08932e+08	3.68453e+06	1.32399e+08	7.90011e+06	1.13279e+08	3.56293e+06
Xle-Tyr-Val-Glu	JYVE	LYVE	IYVE	10.205	C25H38N4O8	522.267	[M+H]+	2.92117e+08	3.18065e+07	2.42566e+08	2.61387e+07	2.07667e+08	3.4187e+07
Ala-Tyr-Tyr-Xle	AYYJ	AYYL	AYYI	15.717	C27H36N4O7	528.256	[M+H]+	5.34493e+07	1.51094e+08	5.4732e+07	1.38532e+08	4.0819e+07	1.41454e+08
Xle-Thr-Xle-Trp	JTJW	LTLW	ITIW	17.175	C27H41N5O6	531.303	[M+H]+	6.24379e+06	1.20531e+08	2.59817e+06	1.2108e+08	4.75147e+06	1.29375e+08
Gln-Gln-Glu-Glu	QQEE	QQEE	QQEE	1.54	C20H32N6O11	532.211	[M+H]+	8.84006e+07	675674	7.8726e+07	1.50543e+06	7.40291e+07	743015
His-Thr-Xle-Tyr	HTJY	HTLY	HTIY	9.391	C25H36N6O7	532.262	[M+H]+	1.07173e+08	1.34967e+08	9.03395e+07	1.3817e+08	8.09898e+07	1.35199e+08
Arg-Pro-Phe-Asp	RPFD	RPFD	RPFD	8.402	C24H35N7O7	533.257	[M+H]+	1.77298e+06	4.31062e+08	5.13611e+06	3.41334e+08	1.85127e+06	3.98711e+08
Thr-Glu-Met-Arg	TEMR	TEMR	TEMR	5.183	C20H37N7O8S	535.24	[M+H]+	1.47985e+08	2.13108e+07	1.41336e+08	1.61741e+07	1.64326e+08	2.16889e+07
Trp-Xle-Ala-Phe	WJAF	WLAF	WIAF	17.956	C29H37N5O5	535.277	[M+H]+	9.74117e+08	5.82685e+07	8.00187e+08	4.34415e+07	7.22349e+08	7.73939e+07
Glu-Met-Glu-Glu	EMEE	EMEE	EMEE	5.559	C20H32N4O11S	536.177	[M+H]+	8.41749e+07	943277	8.64253e+07	2.40894e+06	6.1117e+07	996309
Phe-Gly-Gln-Trp	FGQW	FGQW	FGQW	15.186	C27H32N6O6	536.236	[M+H]+	8.19465e+07	1.06279e+06	7.18798e+07	1.76626e+06	6.7096e+07	1.26114e+06
Tyr-Asn-Xle-Gln	YNJQ	YNLQ	YNIQ	9.015	C24H36N6O8	536.257	[M+H]+	5.77046e+06	2.999e+08	4.93788e+06	2.5453e+08	6.28819e+06	2.5381e+08
Phe-Asn-Phe-Xle	FNFJ	FNFL	FNFI	17.964	C28H37N5O6	539.272	[M+H]+	1.08235e+08	2.83378e+08	8.30385e+07	2.24419e+08	1.02296e+08	3.19842e+08
Arg-Gln-Xle-Gln	RQJQ	RQLQ	RQIQ	5.475	C22H41N9O7	543.311	[M+H]+	1.41544e+08	5.89824e+07	1.01797e+08	5.18662e+07	1.28778e+08	5.61073e+07
Trp-Xle-Val-Glu	WJVE	WLVE	WIVE	13.766	C27H39N5O7	545.283	[M+H]+	6.24867e+06	3.02887e+06	1.1634e+08	2.36576e+06	1.0846e+08	2.79963e+07
Val-Tyr-Xle-Arg	VYJR	VYLR	VYIR	9.169	C26H43N7O6	549.325	[M+H]+	863015	9.52055e+07	238193	8.18027e+07	770325	9.64662e+07
Lys-Tyr-Xle-Gln	KYJQ	KYLQ	KYIQ	8.579	C26H42N6O7	550.309	[M+H]+	2.02321e+08	1.07188e+08	2.50027e+08	1.2204e+08	1.3969e+08	6.46173e+07
Asn-Xle-Phe-Tyr	NJFY	NLFY	NIFY	14.249	C28H37N5O7	555.267	[M+H]+	3.55e+08	7.01278e+08	3.31645e+08	5.66307e+08	2.89602e+08	6.92423e+08
Tyr-Met-Asp-Met	YMDM	YMDM	YMDM	11.148	C23H34N4O8S2	558.179	[M+H]+	7.26787e+07	2.34174e+07	8.14651e+07	2.18765e+07	6.66334e+07	2.1387e+07
Trp-Gln-Pro-Glu	WQPE	WQPE	WQPE	9.324	C26H34N6O8	558.241	[M+H]+	4.03083e+07	1.17186e+06	1.47082e+08	7.03823e+06	6.98691e+06	130264
Trp-Ser-Met-His	WSMH	WSMH	WSMH	10.357	C25H33N7O6S	559.219	[M+H]+	2.76359e+08	6.95762e+06	2.26347e+08	6.15379e+06	2.18294e+08	7.74136e+06
Val-Gln-Trp-His	VQWH	VQWH	VQWH	12.187	C27H36N8O6	568.273	[M+H]+	4.15442e+08	2.64303e+06	4.20133e+08	5.7359e+06	2.69454e+08	2.7767e+06
Phe-Tyr-Xle-Gln	FYJQ	FYLQ	FYIQ	13.672	C29H39N5O7	569.283	[M+H]+	6.22182e+06	6.49023e+07	5.61163e+06	7.52363e+07	6.78832e+06	6.73285e+07
Trp-Gln-Xle-Lys	WQJK	WQLK	WQIK	11.768	C28H43N7O6	573.325	[M+H]+	5.72877e+07	1.73164e+06	7.50584e+07	1.65357e+06	6.13224e+07	1.30669e+06
Xle-Trp-Glu-Glu	JWEE	LWEE	IWEE	11.35	C27H37N5O9	575.257	[M+H]+	2.9931e+08	2.69899e+06	2.98199e+08	4.86993e+06	2.16513e+08	1.95579e+06
Trp-Val-Glu-Phe	WVEF	WVEF	WVEF	16.228	C30H37N5O7	579.266	[M+H]+	8.2686e+08	9.41942e+06	1.07808e+09	1.87756e+07	6.76693e+08	8.72724e+06
Phe-Phe-Asp-Arg	FFDR	FFDR	FFDR	10.536	C28H37N7O7	583.273	[M+H]+	1.18326e+08	1.63835e+06	1.13091e+08	2.98557e+06	9.15626e+07	1.3834e+06
Trp-Xle-Tyr-Asn	WJYN	WLYN	WIYN	12.754	C30H38N6O7	594.278	[M+H]+	6.82341e+06	1.35225e+08	2.35699e+06	1.18899e+08	8.34241e+06	1.52453e+08
Trp-Xle-Tyr-Asn	WJYN	WLYN	WIYN	13.348	C30H38N6O7	594.278	[M+H]+	2.27284e+07	2.59251e+08	1.7215e+07	2.40514e+08	1.69992e+07	2.98124e+08
His-Trp-Xle-Tyr	HWJY	HWLY	HWIY	14.059	C32H39N7O6	617.294	[M+H]+	2.8143e+08	2.29518e+07	3.41022e+08	1.94835e+07	2.4087e+08	2.13769e+07
